# Supplementary material for: Identification of cell cycle–regulated genes periodically expressed in U2OS cells and their regulation by FOXM1 and E2F transcription factors
Source: PubMed Central journal article supplement — Mol Biol Cell. 2013 Dec 1;24(23):3634–50. doi: 10.1091/mbc.E13-05-0264 (PMC3842991; doi:10.1091/mbc.e13-05-0264), 2013-12-01
Supplement: supp_E13-05-0264v1_CombinedSupMats.pdf [file supp_E13-05-0264v1_CombinedSupMats.pdf]

# Supplemental Materials

*Molecular Biology of the Cell*

Grant et al.

**Supplemental Figure 1. FACS data confirms the synchronicity of U2OS cells after release from thymidine or nocodazole.** A-C) FACS data from select timepoints from the double thymidine arrested cells shows a population of synchronous cells. D) Thymidine-nocodazole arrested cells are synchronous after release as shown by select timepoint FACS analysis.

**Supplemental Figure 2. Genes removed by spectral clustering.** A) K-means clustering Power spectra of the first two principal components for each gene called as being cell cycle regulated. Blue indicates genes that passed this filtering step, red indicates genes that did not pass and were removed from further analysis. B) The expression profiles of genes that were removed due to this filtering step.

**Supplemental Figure 3. The correlation scores of cell cycle regulated genes in U2OS cells show differences with HeLa cells.** A) The correlation scores of all cell cycle regulated genes to the "idealized vectors" (see Figure 1) in U2OS cells after hierarchical clustering. B) The cell cycle regulated gene correlations for HeLa cells after hierarchical clustering.

**Supplemental Figure 4. The Expression profiles of genes bound by FOXM1.** The clustered Expression profile of the 1582 genes that are bound by FOXM1 that are not cell cycle regulated in U2OS and HeLa cells.

**Supplemental Figure 5. FOXM1 binds to the promoters of previously published FOXM1 target genes.** A) The FOXM1 binding profile of AURKB for each of two ChIP-seq runs. B) The FOXM1 binding profile of CCNB1 for each of the ChIP-seq runs. C) The binding profile of CCNB2 for the two FOXM1 ChIP-seq runs. D) The Profiles for PLK11 for each of the ChIP-seq runs. E) The FOXM1 binding profiles of TOP2A for both ChIP-seq runs. All binding profiles were visualized on the UCSC genome browser (<http://genome.ucsc.edu/>)

**Supplemental Figure 6. FOXM1 ChIP-seq identifies a subset of previously published targets.** A) Previously published FOXM1 targets that were confirmed by FOXM1 ChIP-seq in HeLa cells. Genes were ordered by the percent coverage of their promoters. B) FOXM1 target genes that were identified by chromatin immunoprecipitations in epithelial cell lines that were not found in this study. See Supplemental Table 4 for references. C) Displaying transcription factor binding as percent coverage of gene model regions. A. The gene model for the FOXM1 target cyclin B2 as defined by the UCSF genome browser divided into regions. Two regions of FOXM1 binding are indicated by large rectangles. B. The gene model from part A displayed as a heat map of percent coverage. In addition to the 1000bp window size depicted in part A, region sizes of 3000bp and 2000bp are also displayed in the heat map display.

**Supplemental Figure 7.** The expression profiles of the 12 previously published FOXM1 targets that we did not verify by ChIP-seq. The expression profiles of the previous published chromatin immunoprecipitated FOXM1 target genes.

**Supplemental Figure 8.** The expression profiles of the 96 cell cycle regulated genes in HeLa cells, U2OS cells, foreskin fibroblasts, and HaCaT cells. The clustered expression profiles and ENCODE data for the 96 genes that were cell cycle regulated in four independent cell types. Foreskin fibroblast and HaCat data was mean centered for display purposes (Bar-Joseph et al. 2008) (Pena-Diaz et al. 2013). Double thymidine (TT), thymidine nocodazole (TN), and Serum thymidine (S-T) synchronizations are shown. Note, the five gray bars in the HeLa datasets indicate these genes were not included in the two time courses selected for display, but the genes were identified as cell cycle regulated in the original publication (Whitfield et al. 2002).

**Supplemental Figure 9.** The estimated percent false discovery rate (FDR) for the analysis using the double thymidine time courses only (grey line) or all time courses (black line). Data was randomized by rows and columns to estimate the FDR (see materials and methods).

**Supplemental Figure 10.** Alternate color scheme for Figures 1 – 8 from the main text. Each figure showing gene expression data is presented here in a Blue / Yellow color format.

# Supplemental Figure 1

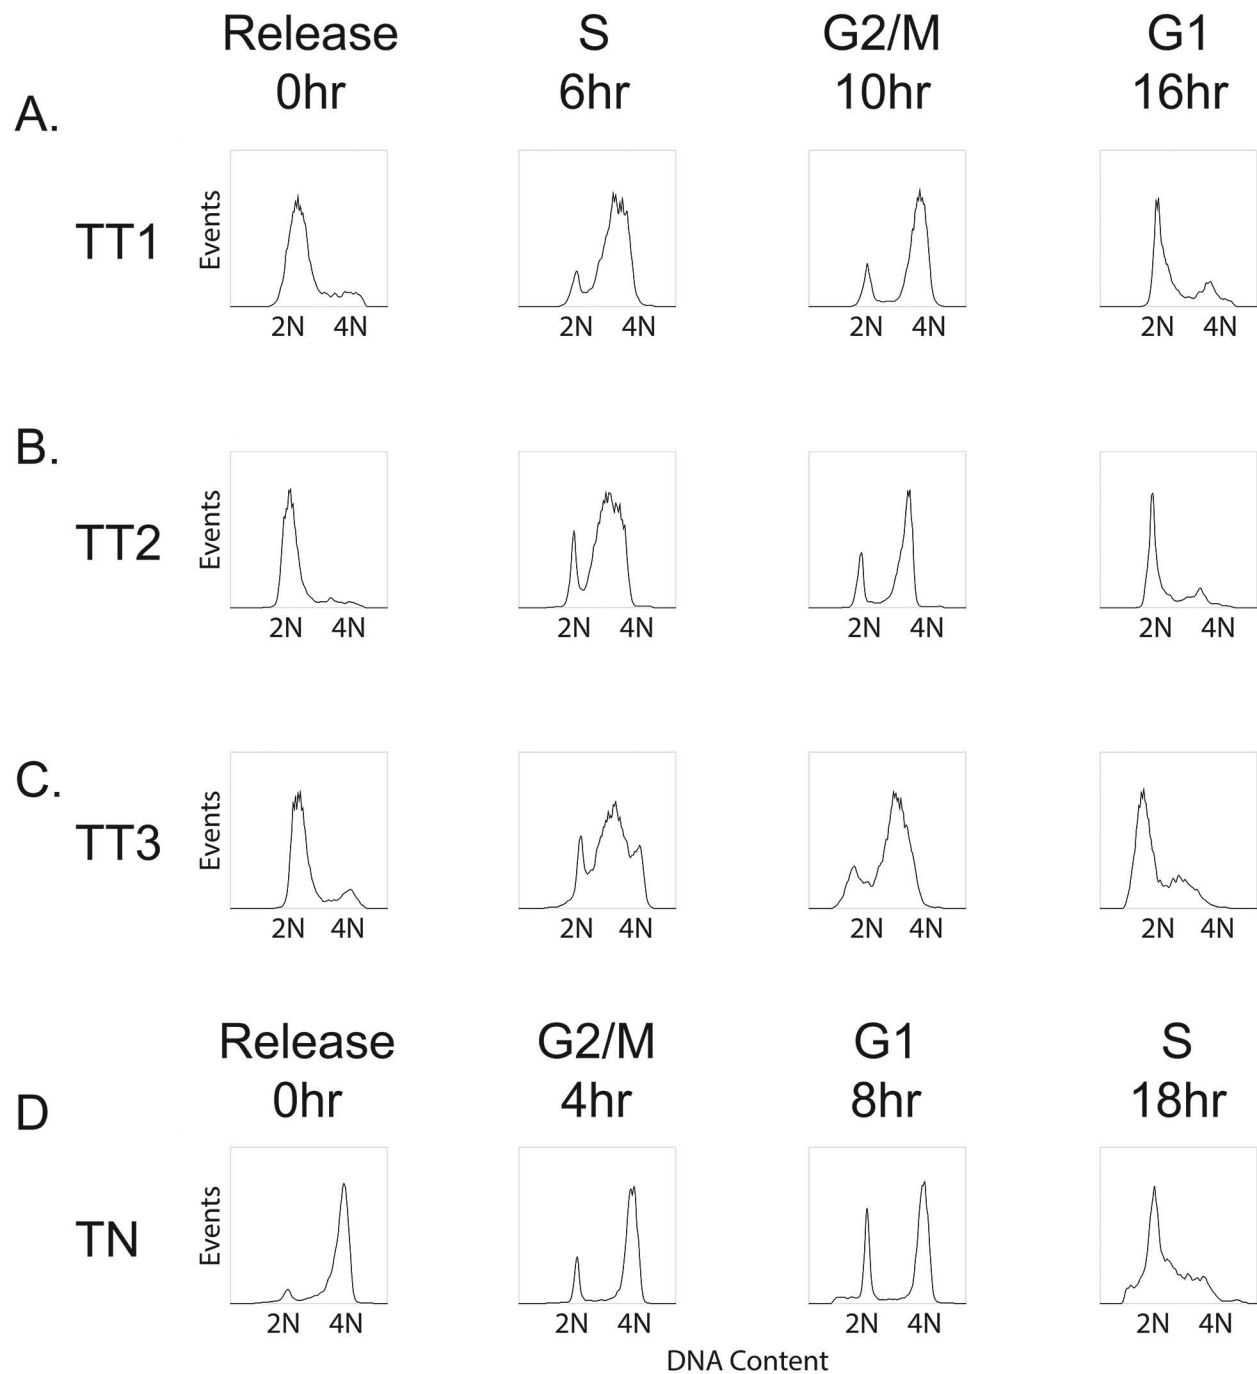

# Supplemental Figure 2

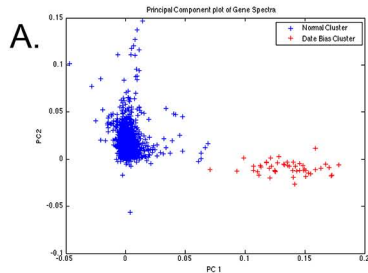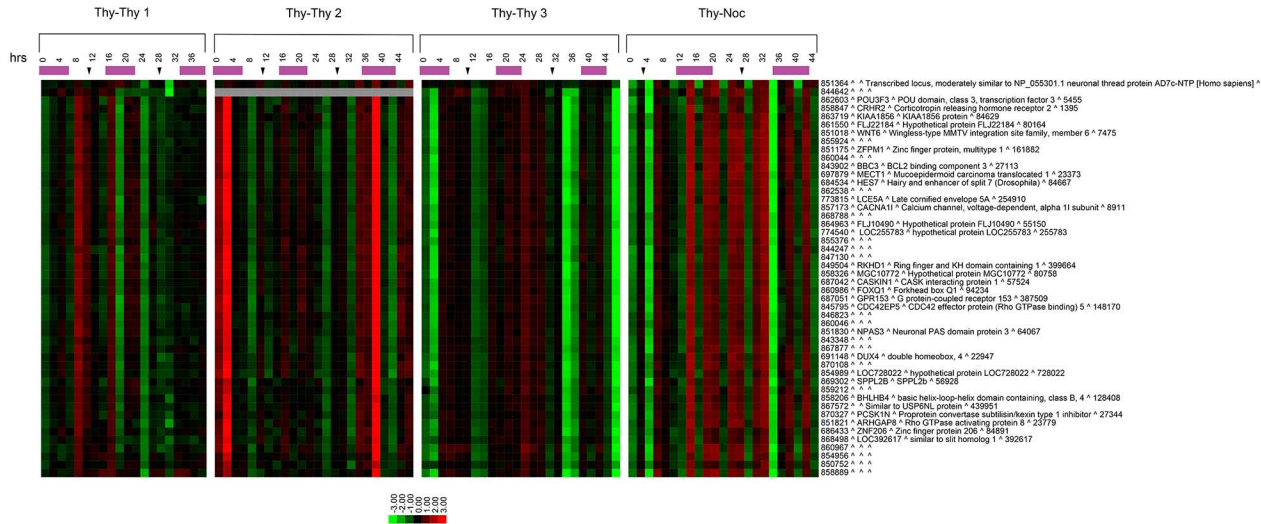

# Supplemental Figure 3

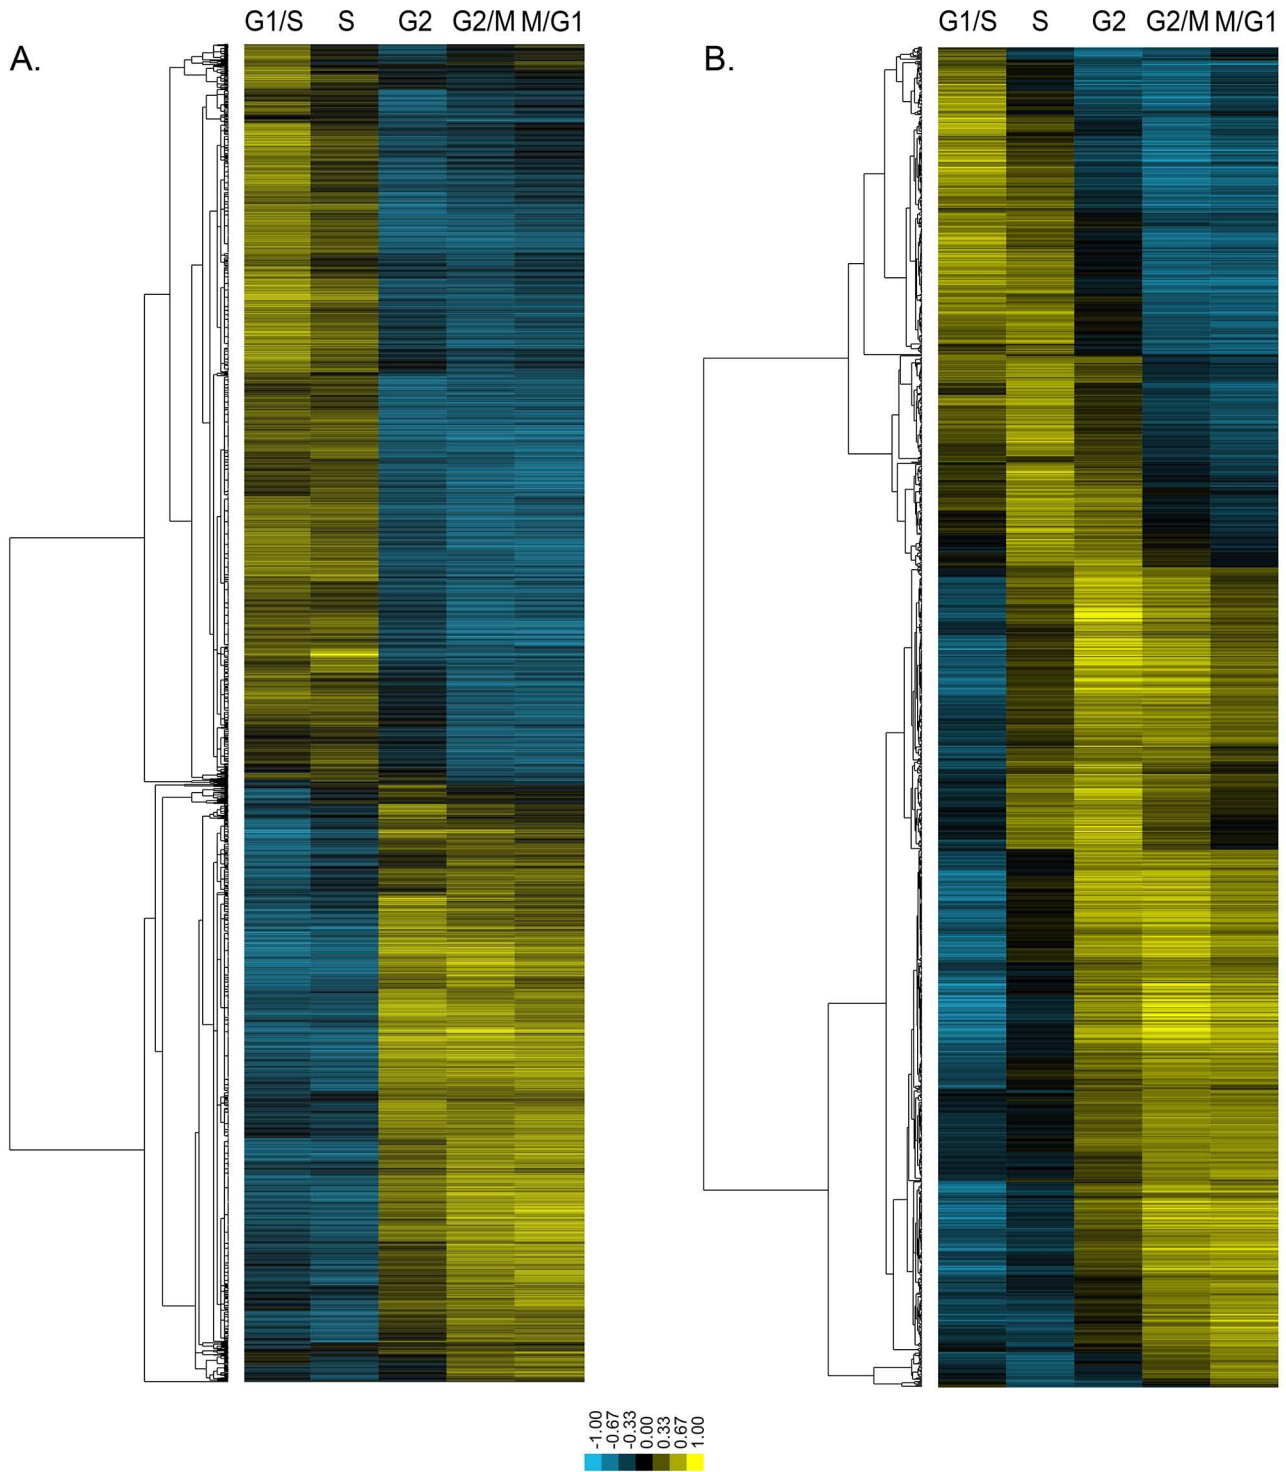

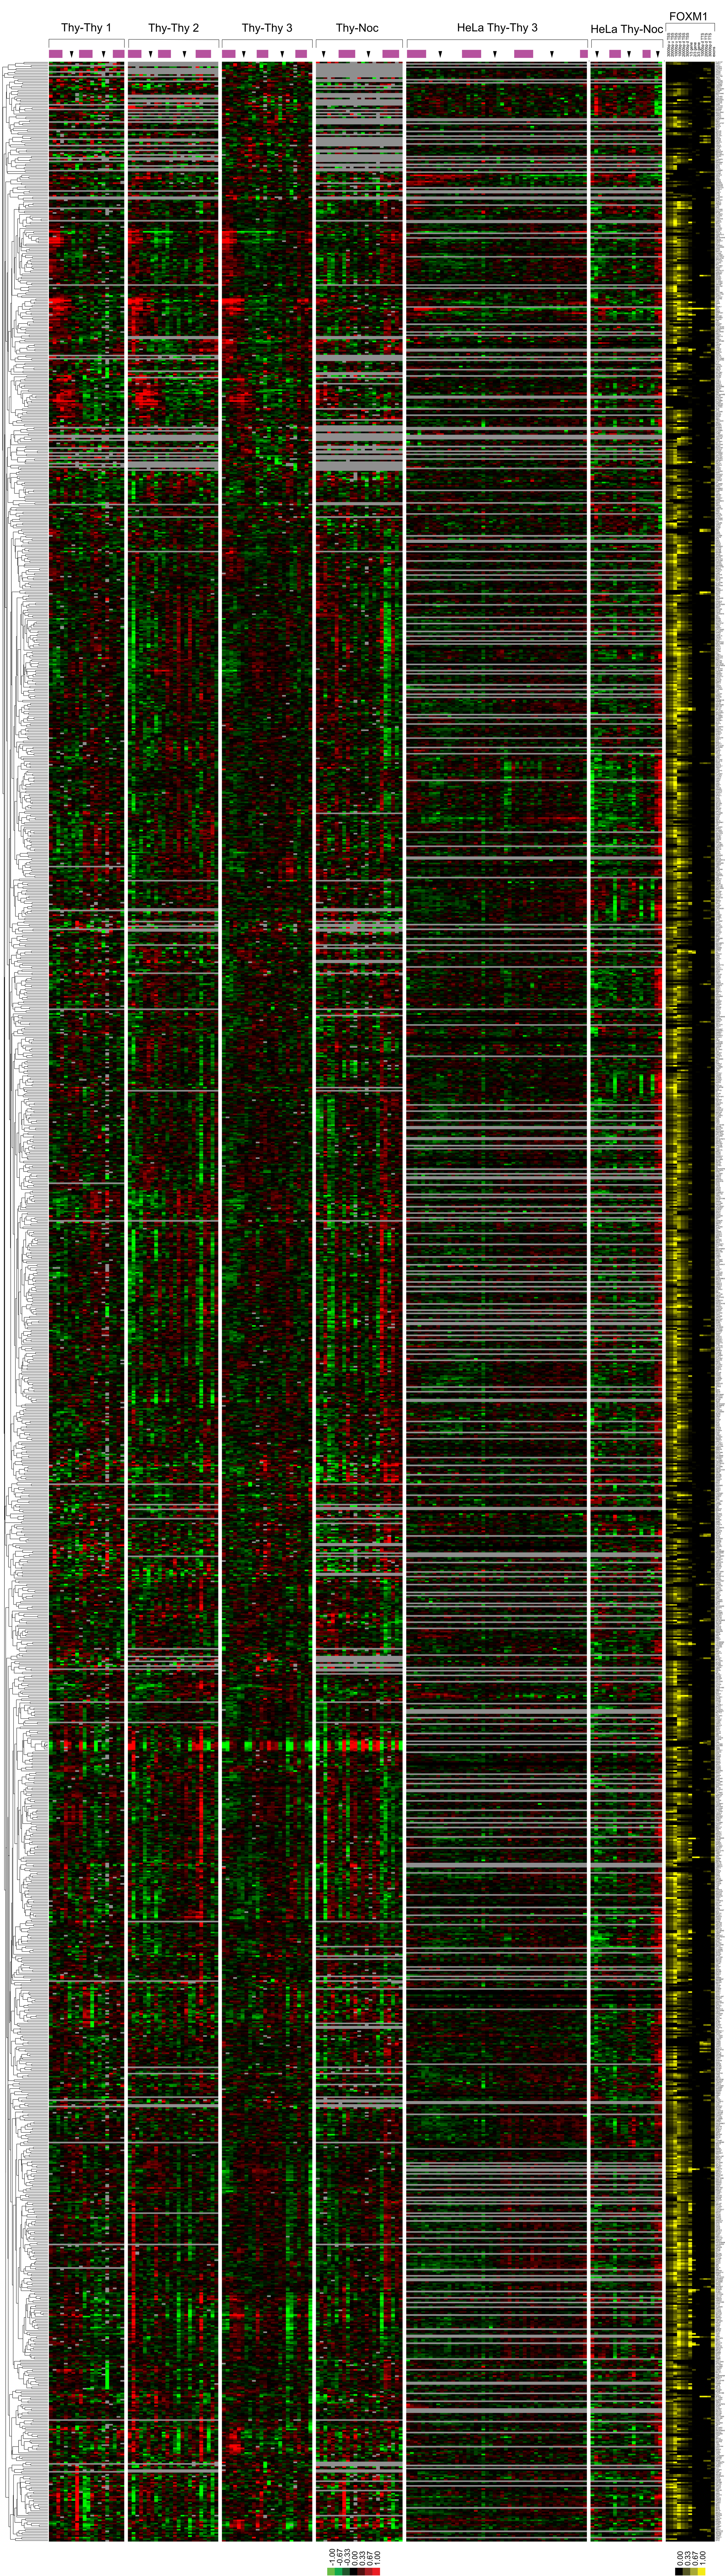

# Supplemental Figure 5

A.

AURKB

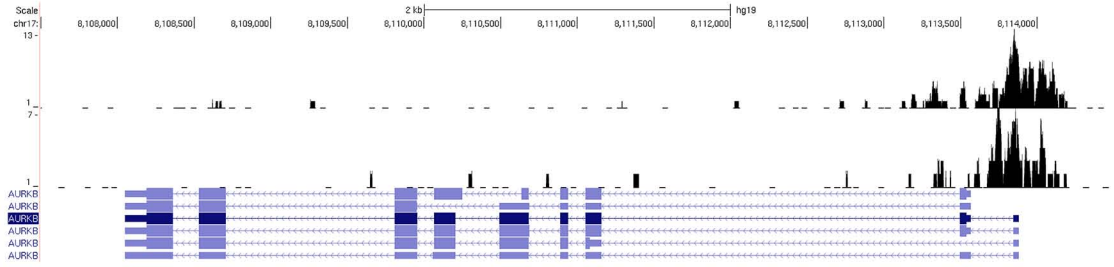

B.

CCNB1

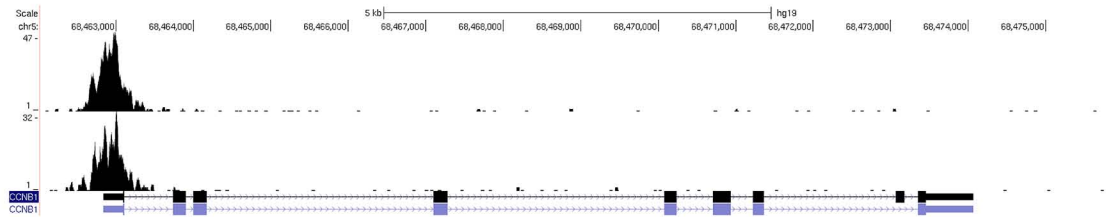

C.

CCNB2

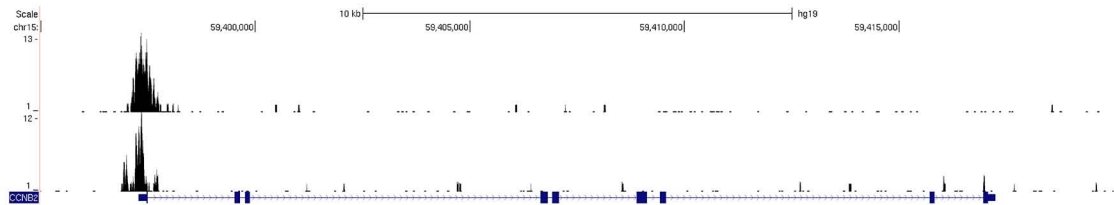

D.

PLK1

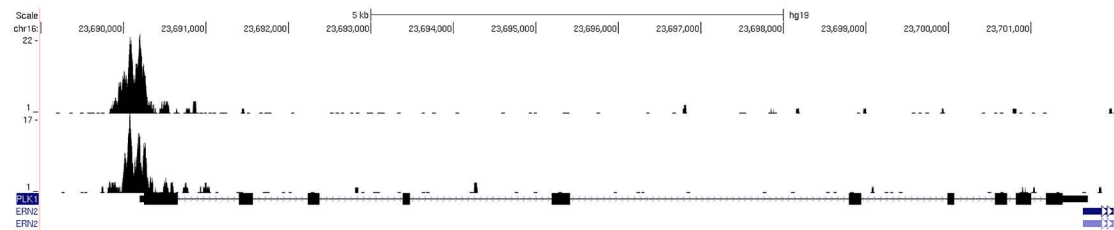

E.

TOP2A

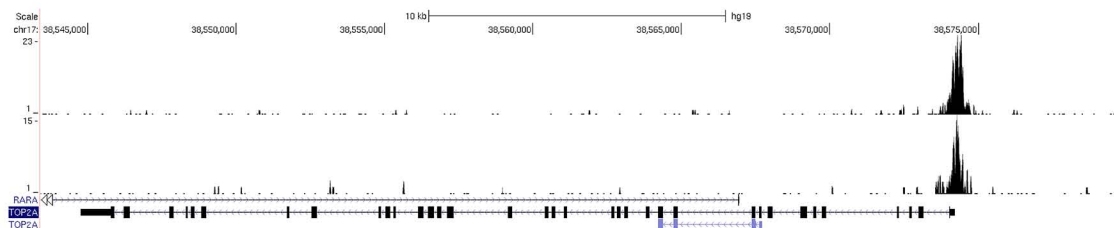



**A**

FOXM1  
ChIP-seq  
Coverage

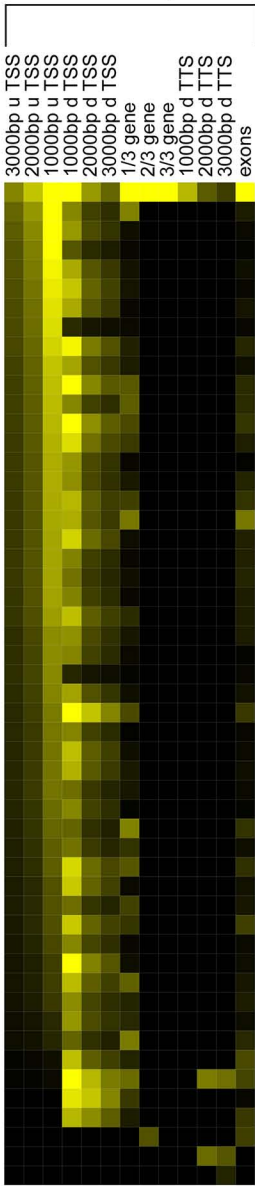

- Symbol**
- NFκB-p65 (RELA)
  - HMGB2
  - BORA
  - CCNF
  - PRC1
  - TOPO 2α (TOP2A)
  - DTL
  - CCNG2
  - AURKA
  - HJURP
  - KIF20A
  - CDC20
  - PLK1
  - CCNB1
  - CENPF
  - CDCA8
  - CENPA
  - UBEC (UBE2C)
  - NUSAP1
  - CDCA2
  - KAP (CDKN3)
  - CDC25C
  - NEK2
  - CCNB2
  - SMC4L1 (SMC4)
  - E2F2
  - CEP55
  - TYMS
  - Brip1 (BRIP1)
  - RACGAP1
  - MCM3
  - KIF22
  - CENPE
  - H2AFZ
  - PTTG1
  - CCNA2
  - BUBR1 (BUB1B)
  - SOX4
  - GMNN
  - POLD3
  - ANLN
  - AURKB
  - BIRC5
  - PRDX3
  - Hsp70 (HSPA1A)
  - PPIL5 (LRR1)
  - CDC25B
  - PHF19
  - CHK1 (CHEK1)
  - PCNA
  - ELF3
  - p27KIP1 (CDKN1B)

**B**

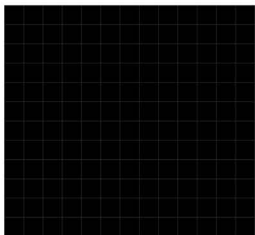

Percent Coverage

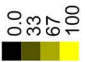

**C**

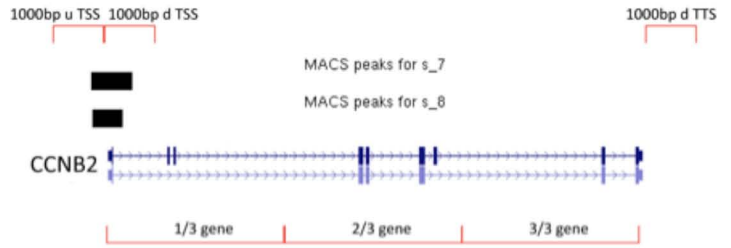

# Supplemental Figure 7

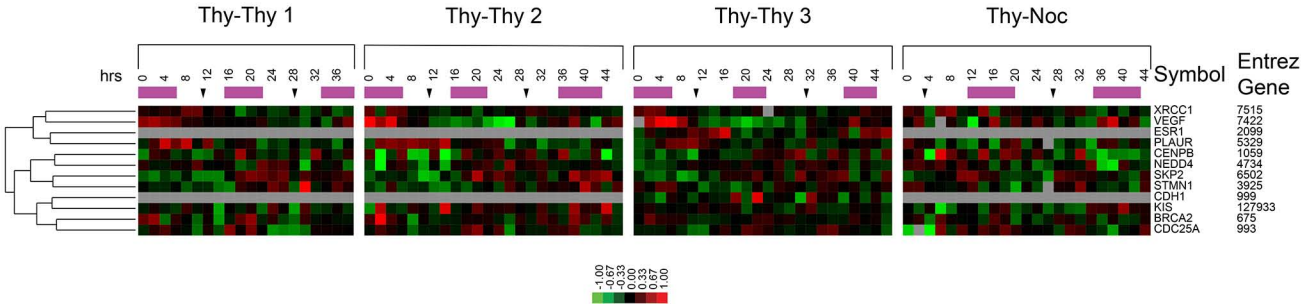

U2OS

HeLa

Foreskin  
fibroblasts

HaCaT

FOXM1

E2F1

E2F4

E2F6

GABPA

FOXK1

TT 1

TT 2

TT 3

TN

TT 3

TN

S-T

TT 1

TT 2

TT 3

Entez  
Gene

Symbol

COC20 991  
 IREB3 27338  
 PTTG1 9232  
 BRCS 332  
 ARLBP 23204  
 CDC46 55143  
 CDC43 83461  
 COC29C 995  
 CKS2 1184  
 DLG7 9787  
 CCNB1 891  
 PLK1 5347  
 TOP2 22974  
 CCNB2 9133  
 BUB1 689  
 NEC1 4751  
 FLJ10156 54476  
 CENPF 1093  
 CENPE 1082  
 SPAC5 10818  
 MKI67 4288  
 GTSB1 51512  
 GPSM2 29899  
 C10orf3 55165  
 PRC1 3095  
 HMG83 3149  
 SRAO3 54903  
 KIF2C 11004  
 ESPL1 9700  
 TROAP 10024  
 KIF22 3633  
 CCNP1 6916  
 TACC3 10460  
 COC28B 894  
 KNTC2 16403  
 NUSAP1 51303  
 SHCBP1 78901  
 ARHGAP19 84685  
 E2F5 1875  
 LBR 3830  
 HMHR 3181  
 MPHOSPH1 9585  
 ARHGAP11A 9834  
 SFPO 6421  
 ANP32E 9121  
 Cep70 89321  
 HMG82 3148  
 BRD8 15902  
 TOPK 55872  
 CDKN2C 1031  
 BUB3 9184  
 LBEC2 11085  
 TOP2A 7153  
 KIF18A 3838  
 GPR126 57211  
 KIF17 3074  
 KIF23 9493  
 CENPA 1028  
 TTK 7272  
 CKAP2 26586  
 CCNA2 893  
 BUB1B 791  
 RIF1 3832  
 CKS1B 1163  
 CCNE 899  
 DNFB2a762E1312 899  
 HIST1H4C 8364  
 CENP 4174  
 E2F1 1869  
 COC25A 893  
 SLBP 7884  
 RCM2 4171  
 UNG 7374  
 DDC1 79076  
 PLOD3 10714  
 RFC4 5984  
 PCNA 9111  
 Ckap776 89010  
 MCM6 4176  
 FLJ20516 54982  
 CDC8 966  
 RAMP 51514  
 CCNE1 898  
 CHAF1A 10038  
 CHAF1B 8208  
 CCNE2 9134  
 AH1 54808  
 PMSK 23178  
 HSP88 20353  
 SLC38A2 54407  
 FRM1 557  
 RFC2 5982  
 FDX1 9156  
 RRM2 6241  
 BARD1 580  
 C14orf130 55148

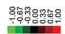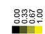

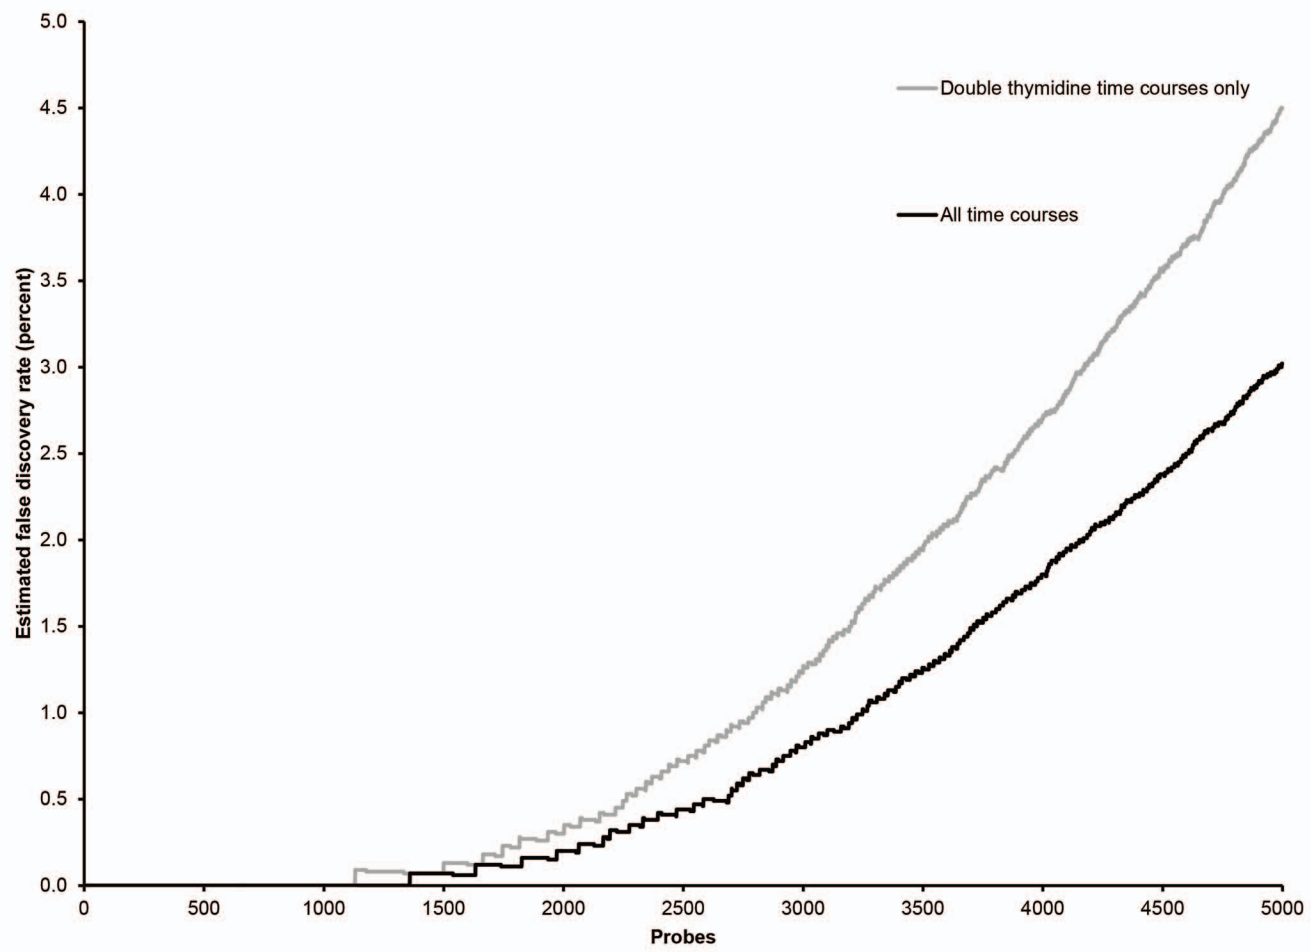

Figure 1

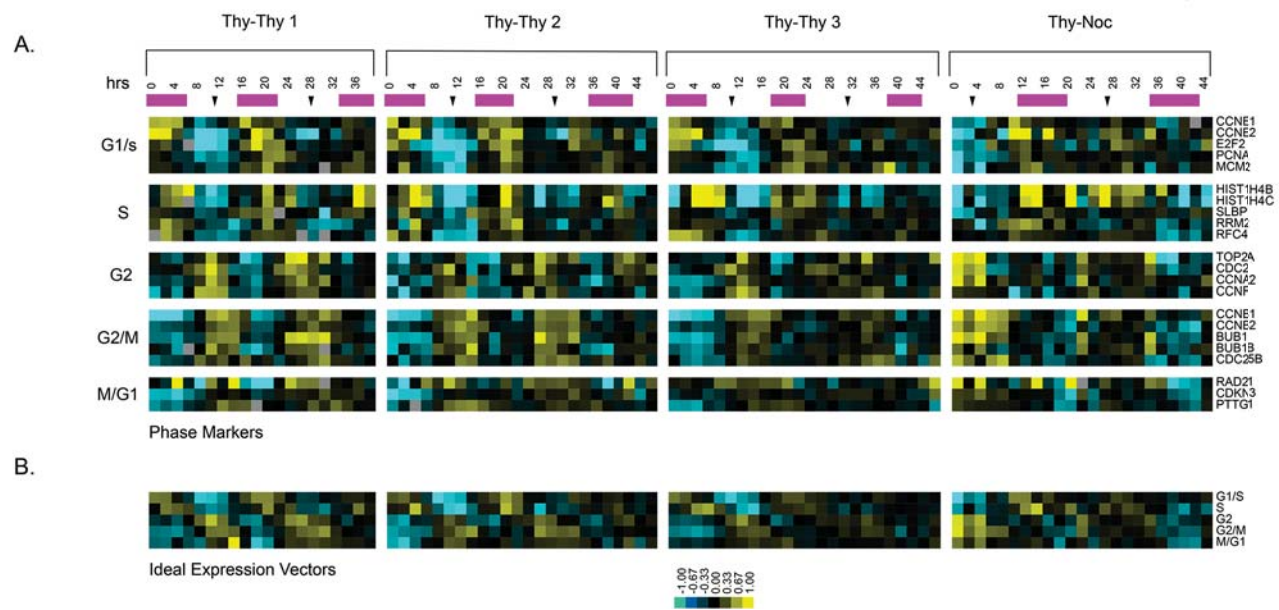

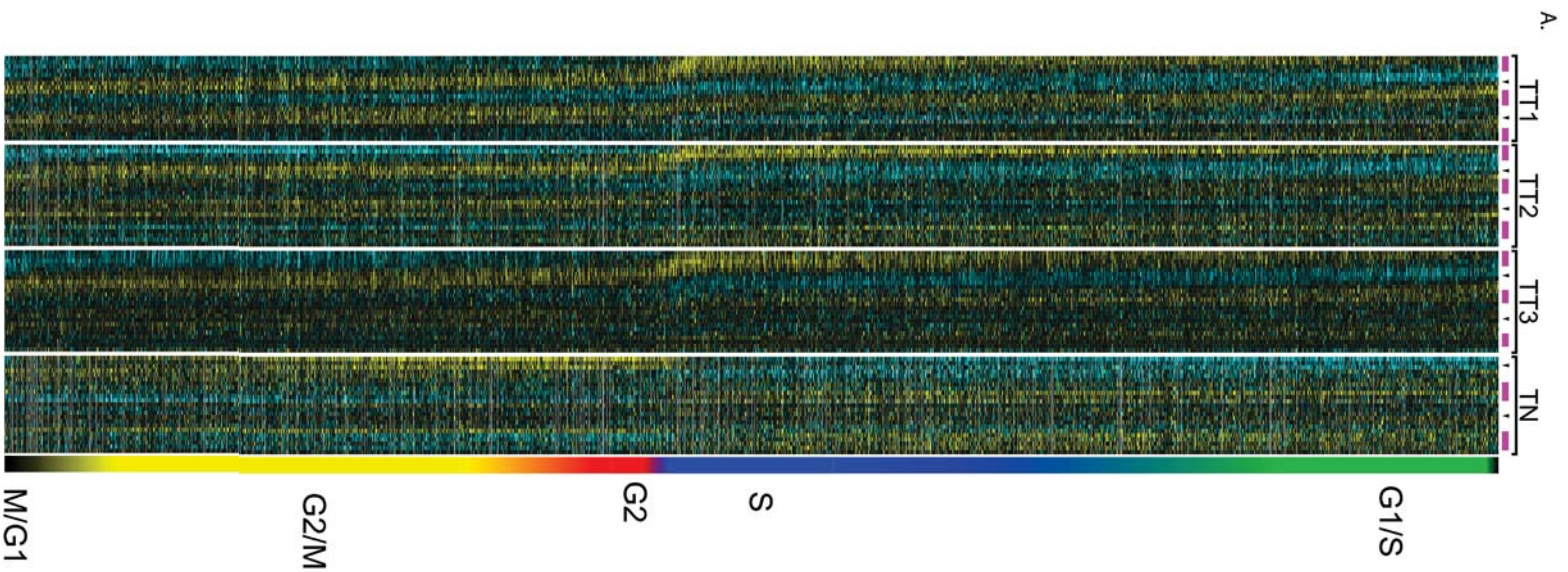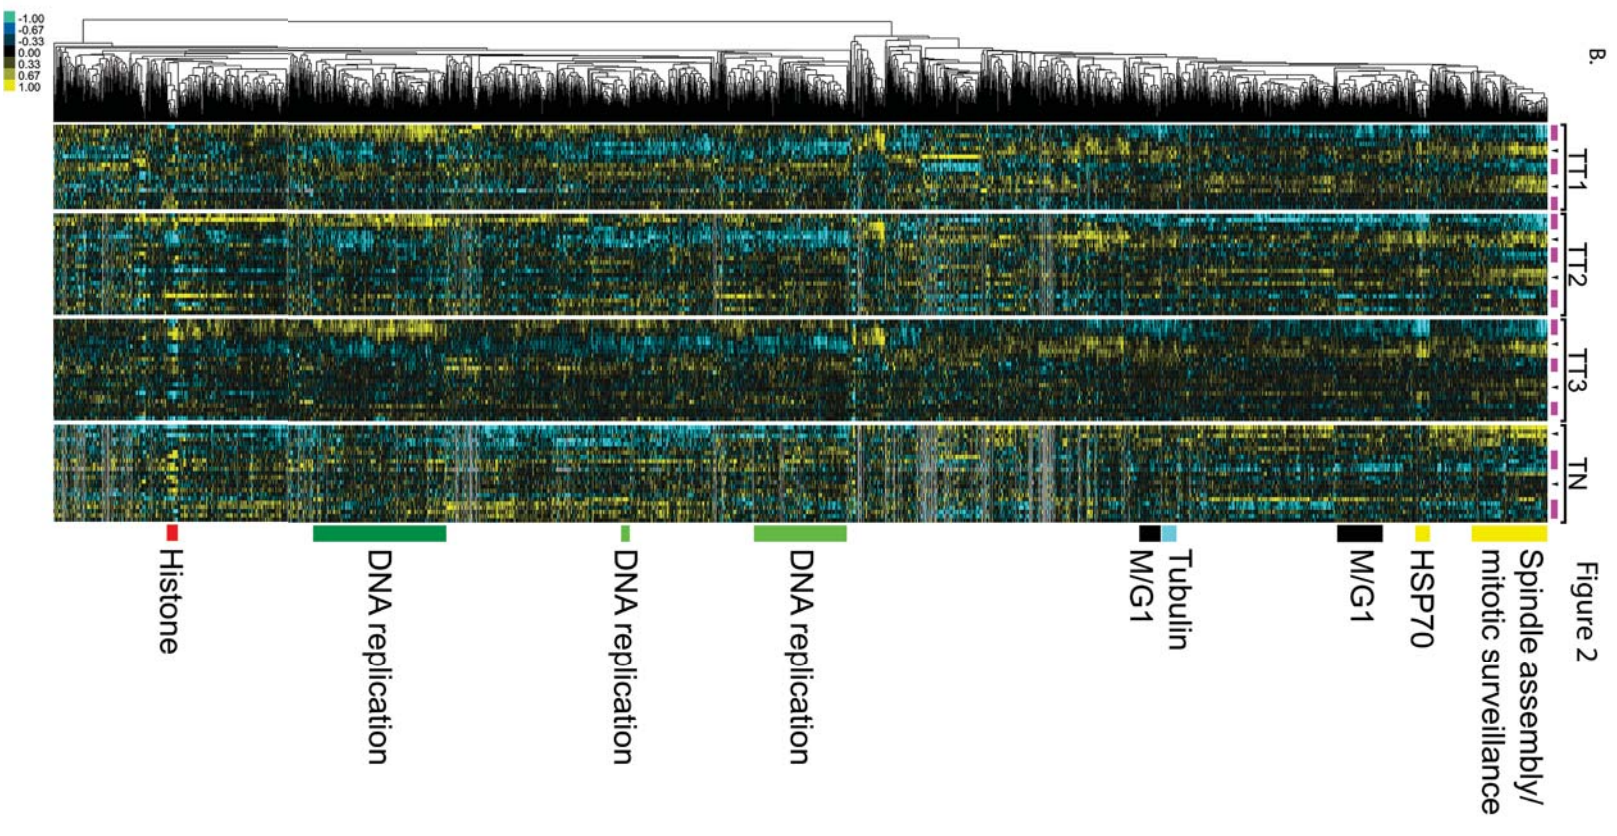

Figure 2

A.

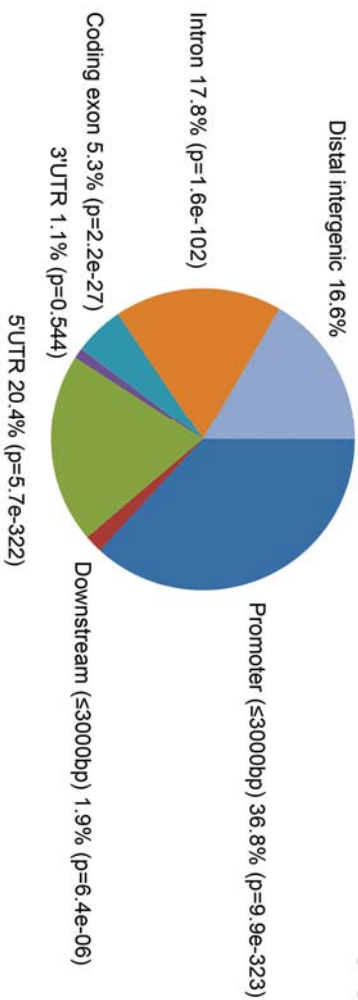

Figure 3

B.

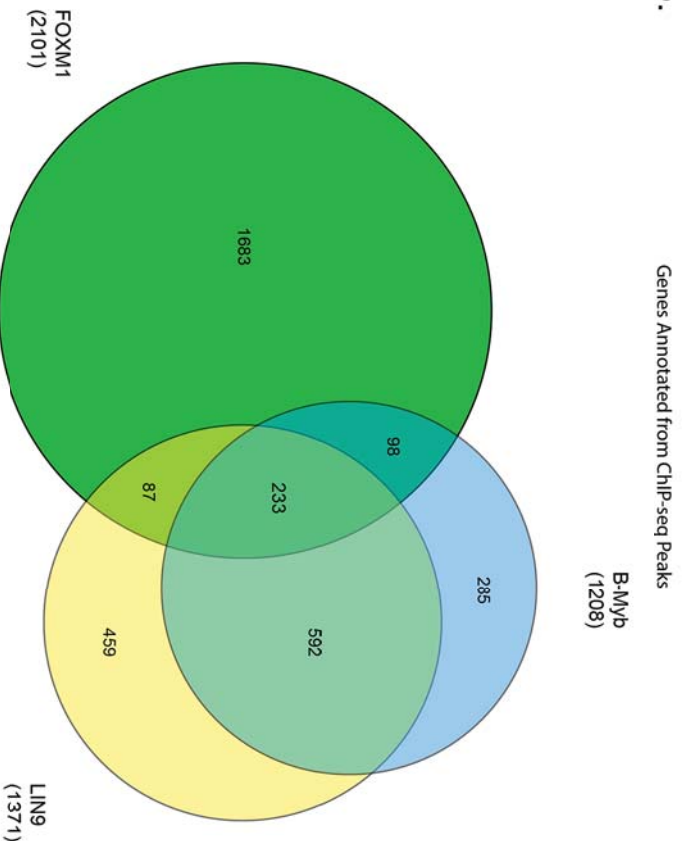

DAVID Analysis

|                        |                                                 |          |
|------------------------|-------------------------------------------------|----------|
| FOXM1 only             |                                                 |          |
| BP                     | 1. Translation                                  | 3.49E-46 |
| CC                     | 2. Translational elongation                     | 1.32E-27 |
|                        | 1. Intracellular organelle lumen                | 3.04E-51 |
|                        | 2. Ribonucleoprotein complex                    | 8.86E-51 |
| FOXM1 and B-Myb        |                                                 |          |
| BP                     | 1. Cell Cycle                                   | 5.35E-06 |
| CC                     | 2. Mitotic Cell Cycle                           | 1.47E-05 |
|                        | 1. Intracellular non-membrane-bounded organelle | 4.81E-09 |
|                        | 2. Non-membrane-bounded organelle               | 4.81E-09 |
| FOXM1, B-Myb, and LIN9 |                                                 |          |
| BP                     | 1. M phase                                      | 3.26E-39 |
| CC                     | 2. Nuclear Division                             | 3.81E-38 |
|                        | 1. Spindle                                      | 7.95E-28 |
|                        | 2. Chromosome                                   | 2.51E-27 |
| FOXM1 and LIN9         |                                                 |          |
| BP                     | 1. Cell Division                                | 6.36E-05 |
| CC                     | 2. M phase                                      | 8.12E-04 |
|                        | 1. Chromosome                                   | 7.29E-04 |
|                        | 2. Chromosomal part                             | 1.26E-03 |
| B-Myb only             |                                                 |          |
| BP                     | 1. Regulation of growth                         | 1.60E-02 |
| CC                     | 2. Interphase of mitotic cell cycle             | 2.09E-02 |
|                        | 1. Centrosome                                   | 1.84E-02 |
|                        | 2. Cytosol                                      | 2.11E-02 |
| B-Myb and LIN9         |                                                 |          |
| BP                     | 1. Actin cytoskeleton organization              | 8.18E-05 |
| CC                     | 2. Actin filament-based process                 | 1.90E-04 |
|                        | 1. Cytoskeleton                                 | 2.94E-05 |
|                        | 2. Actin cytoskeleton                           | 2.96E-05 |
| LIN9 only              |                                                 |          |
| BP                     | 1. Cell adhesion                                | 9.56E-04 |
| CC                     | 2. Biological adhesion                          | 9.73E-04 |
|                        | 1. Cytoskeleton                                 | 1.11E-04 |
|                        | 2. Cell-cell junction                           | 3.48E-04 |

Gene Ontology Functional Annotation

C.

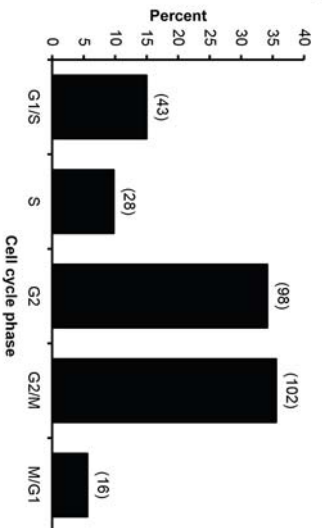

D.

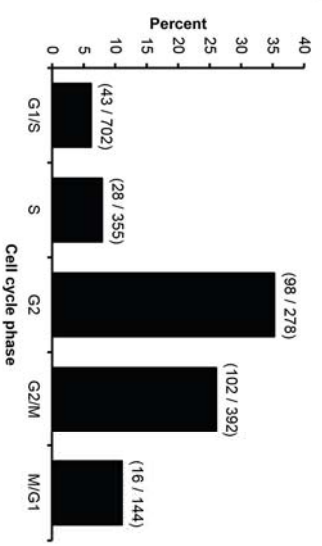

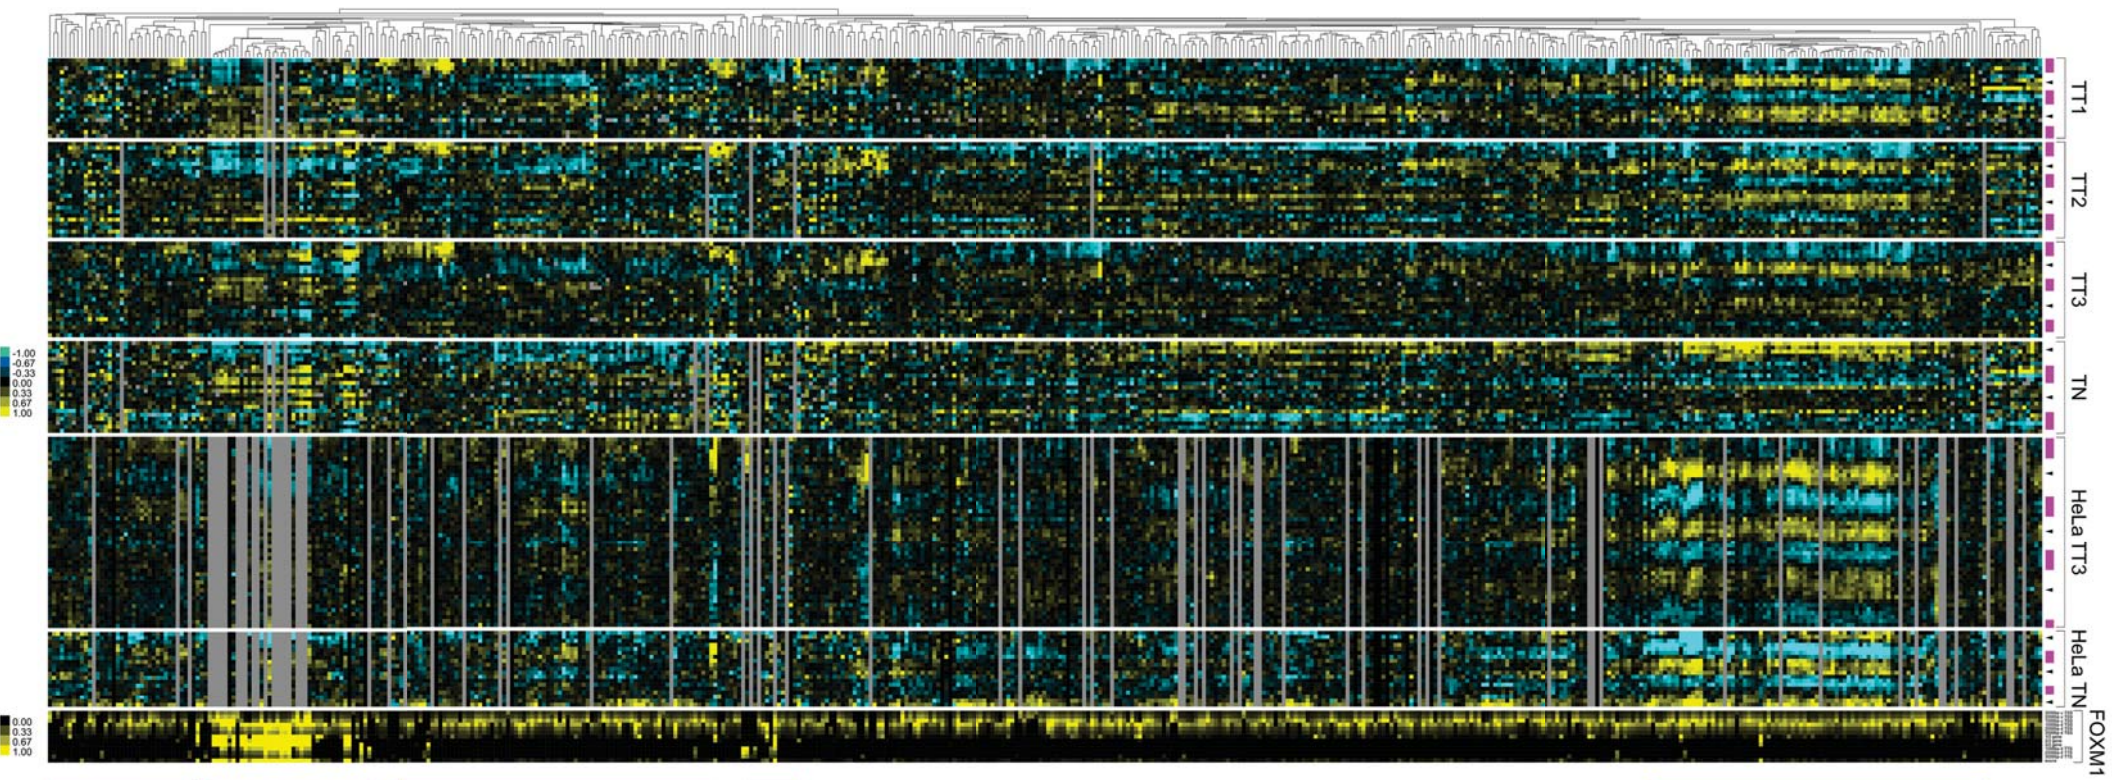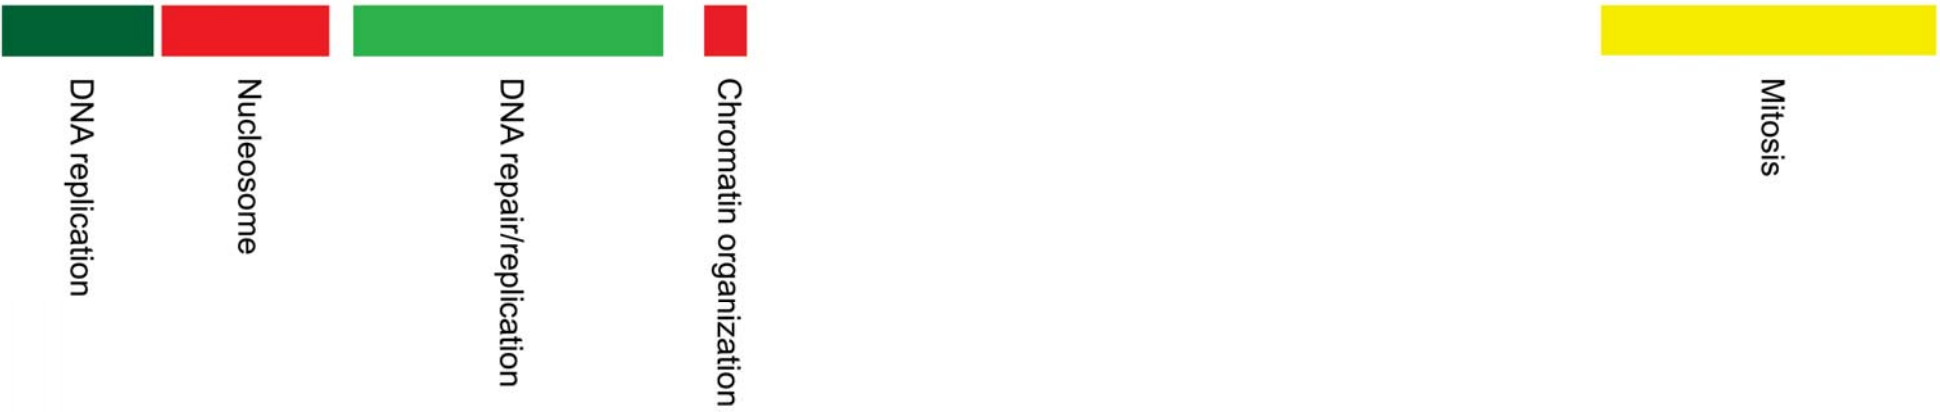

Figure 4



# Figure 5

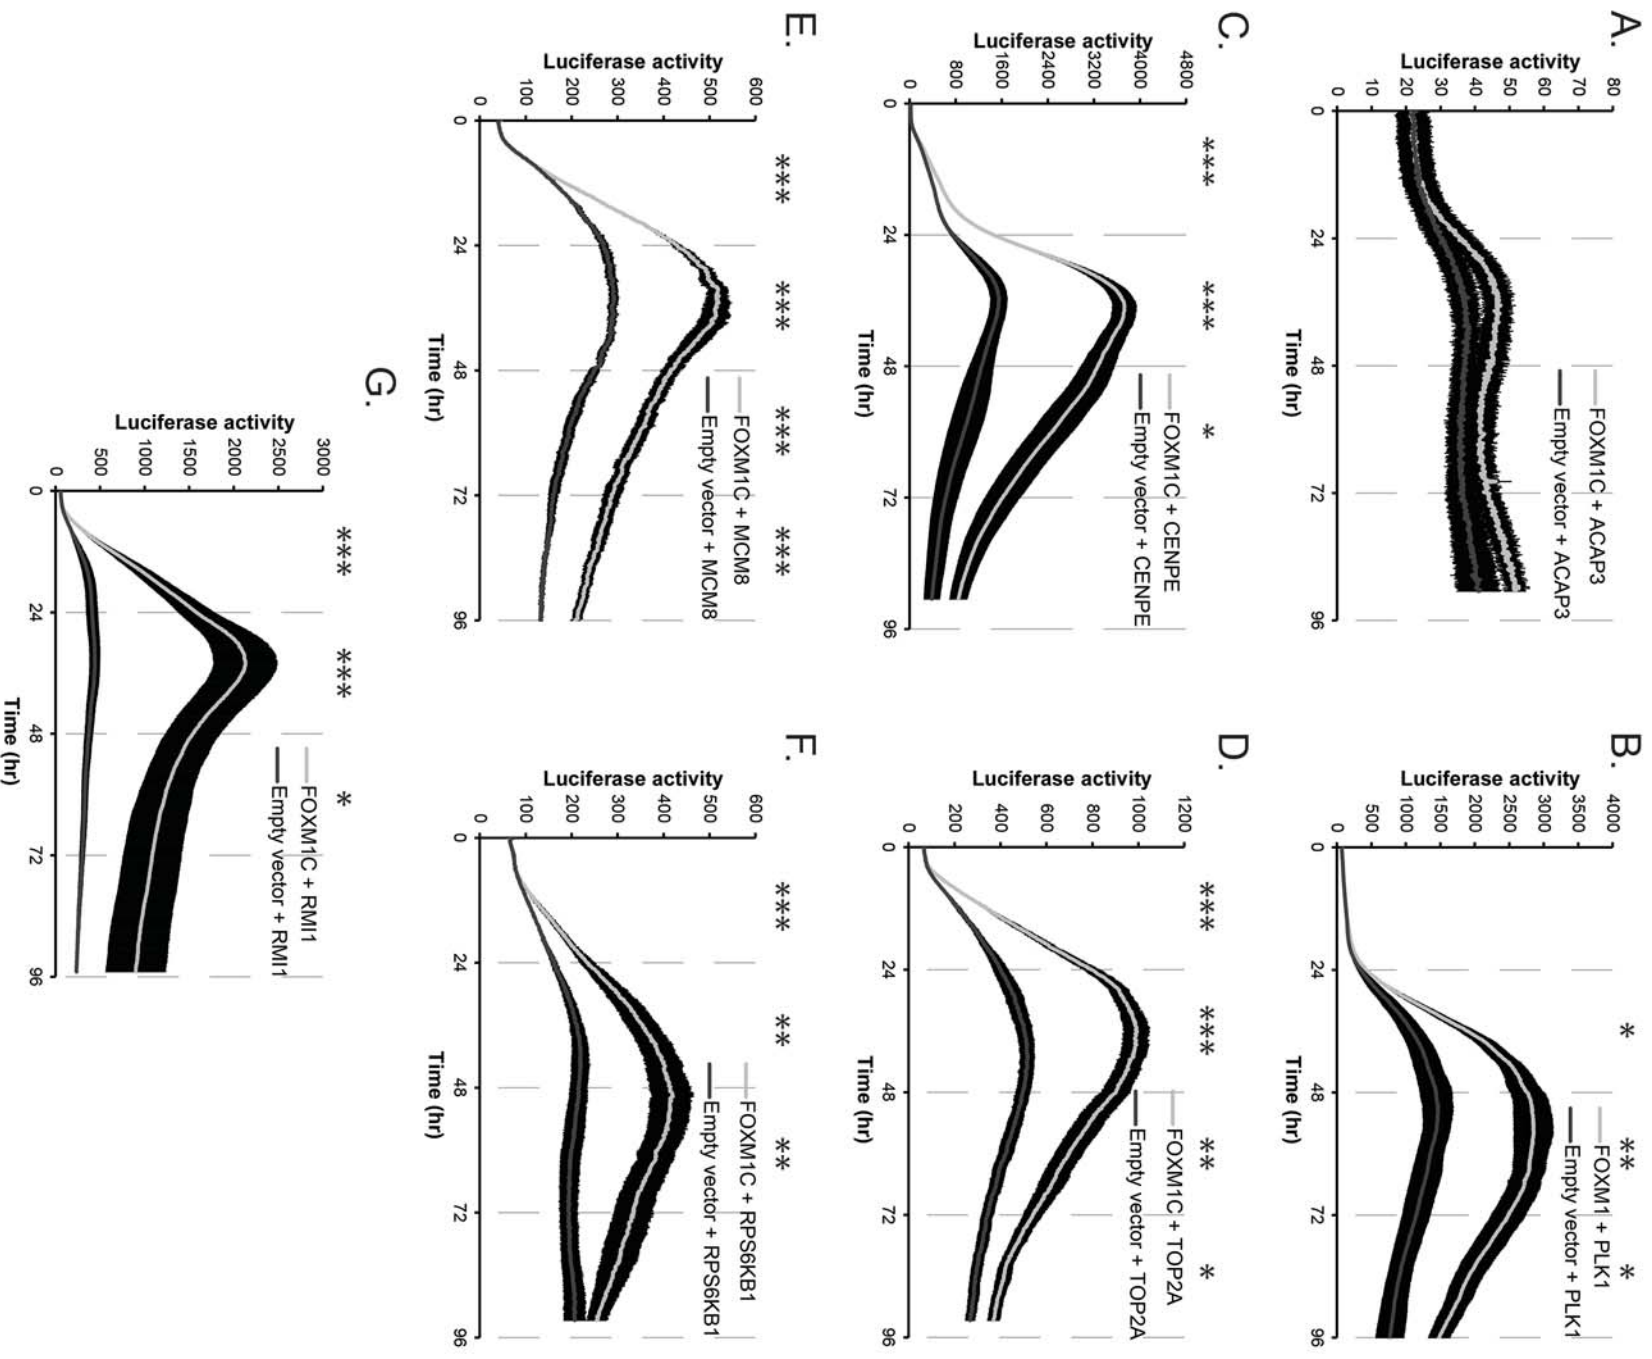

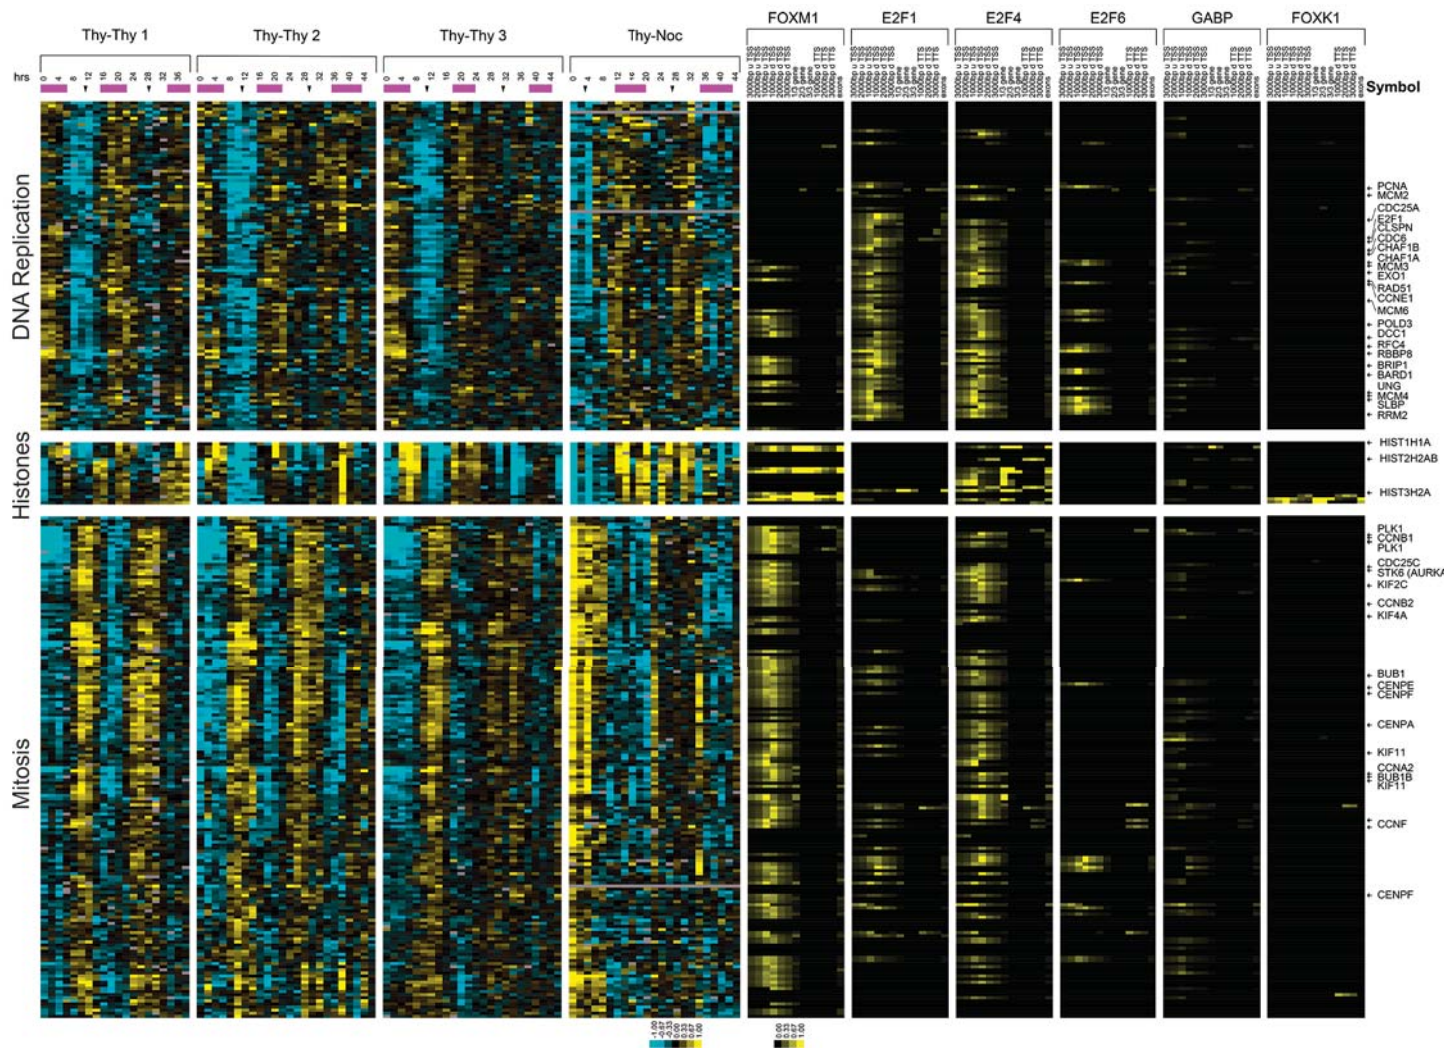

Figure 7

A.

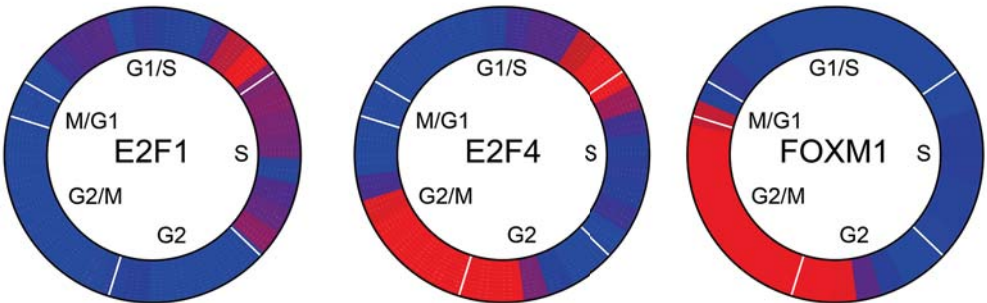

B.

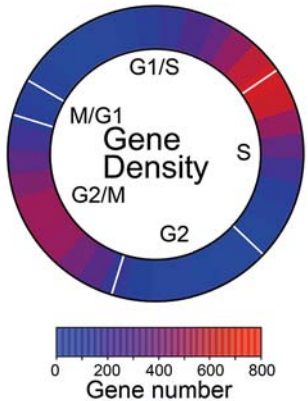

C.

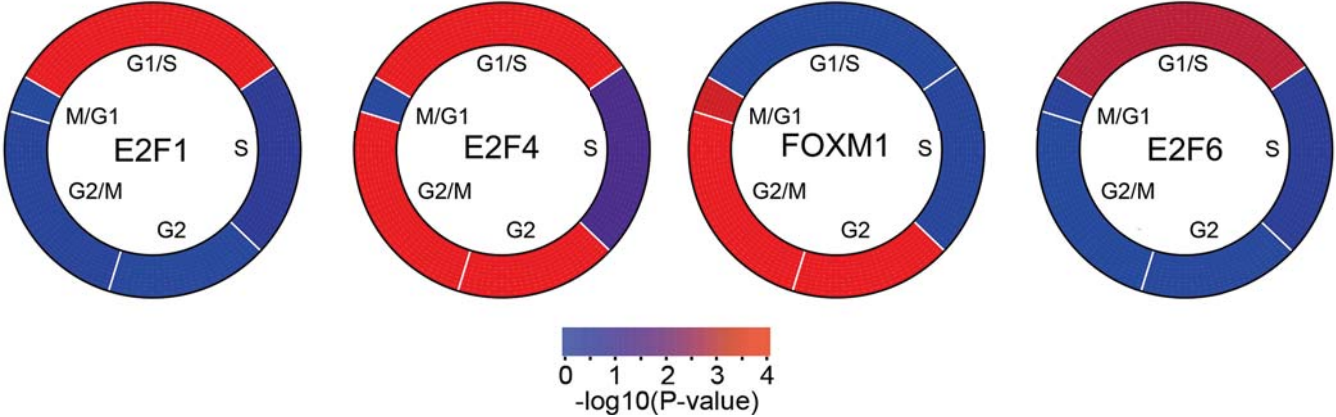

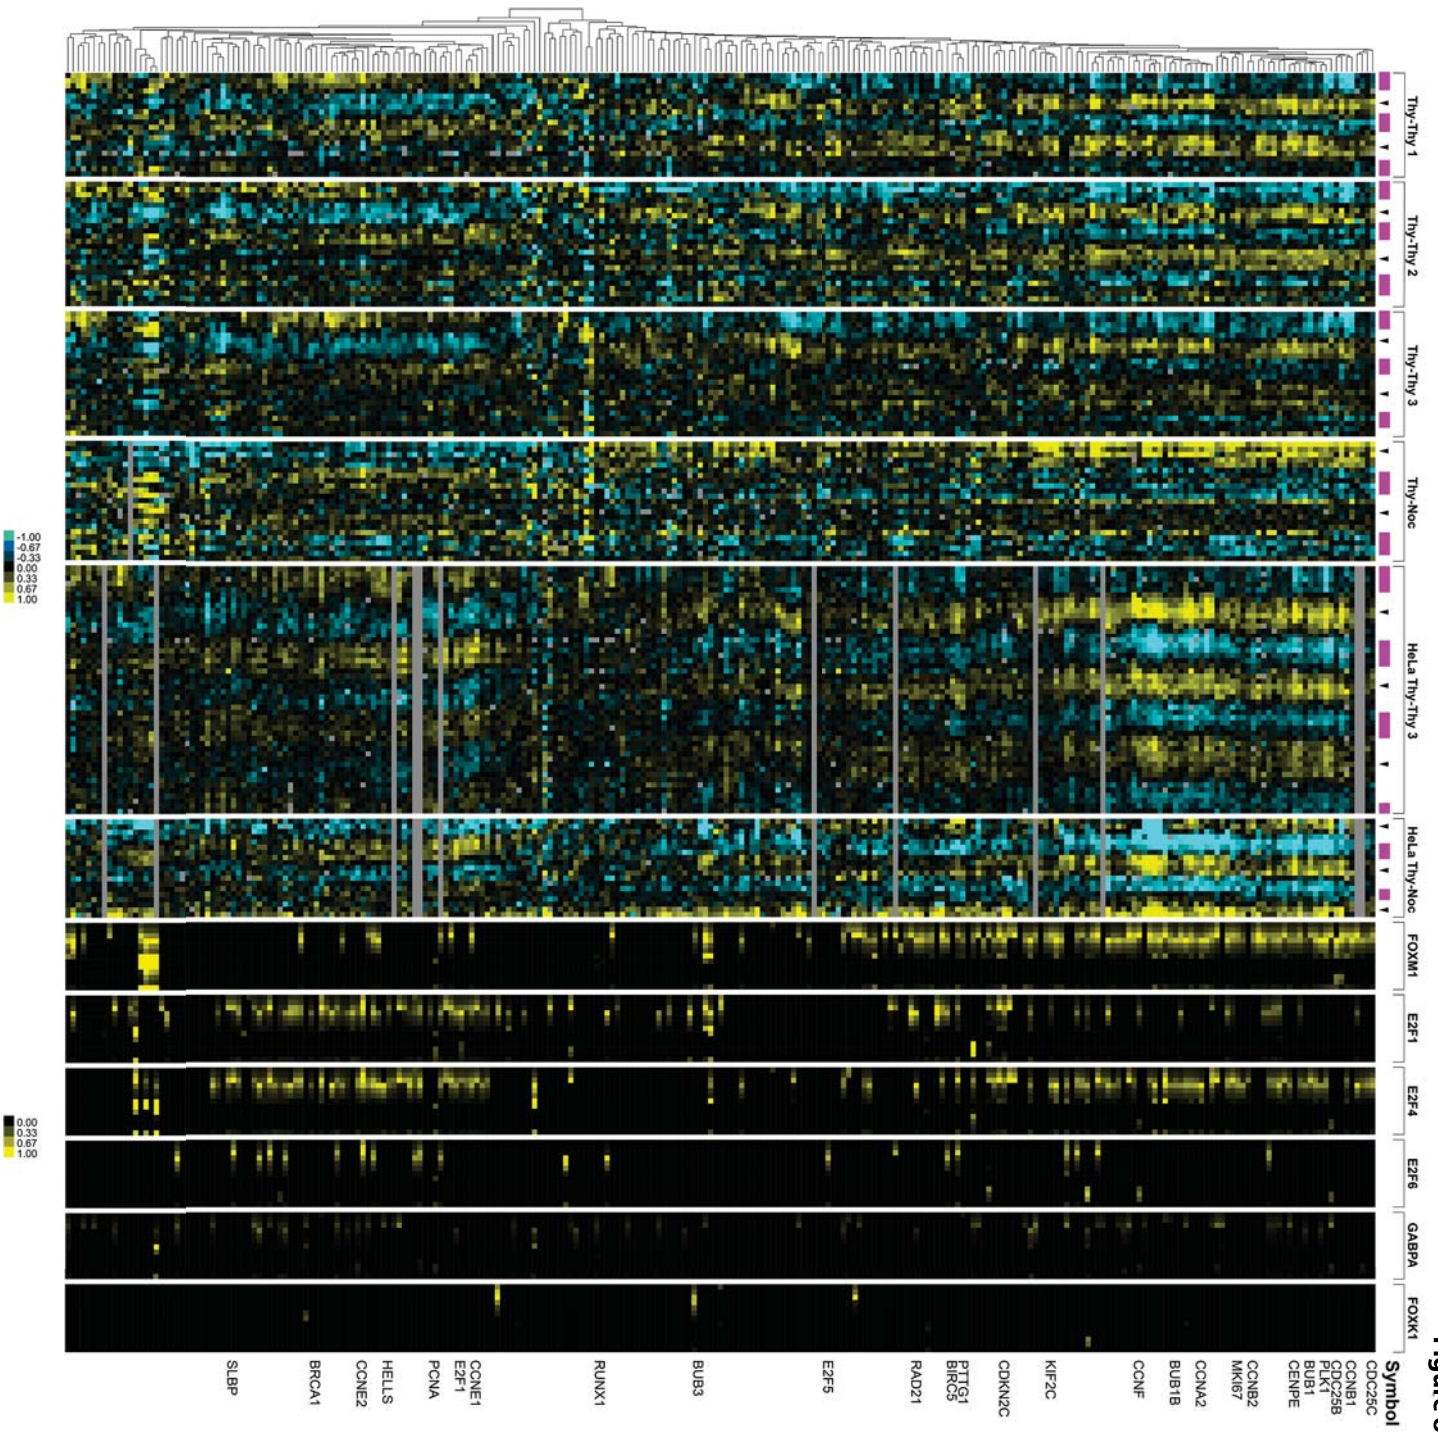

Figure 8

**Supplemental Table 4: Previous identified FOXM1 target genes**

| <b>Symbol</b>   | <b>Entrez GeneID</b> | <b>Citations</b>                                                                                                                                                                                                                                                                                                                                                                     |
|-----------------|----------------------|--------------------------------------------------------------------------------------------------------------------------------------------------------------------------------------------------------------------------------------------------------------------------------------------------------------------------------------------------------------------------------------|
| NFκB-p65 (RELA) | 8970                 | (Bao, Wang et al. 2011)                                                                                                                                                                                                                                                                                                                                                              |
| HMGB2           | 3148                 | (Huynh, Soh et al. 2011)                                                                                                                                                                                                                                                                                                                                                             |
| BORA            | 79866                | (Alvarez-Fernandez, Halim et al. 2010)                                                                                                                                                                                                                                                                                                                                               |
| CCNF            | 899                  | (reviewed in (Wierstra and Alves 2007))                                                                                                                                                                                                                                                                                                                                              |
| PRC1            | 9055                 | (Huynh, Soh et al. 2011)                                                                                                                                                                                                                                                                                                                                                             |
| TOPO 2α (TOP2A) | 7153                 | (Wang, Meliton et al. 2009)                                                                                                                                                                                                                                                                                                                                                          |
| DTL             | 51514                | (Anders, Ke et al. 2011)                                                                                                                                                                                                                                                                                                                                                             |
| CCNG2           | 901                  | (Anders, Ke et al. 2011)                                                                                                                                                                                                                                                                                                                                                             |
| AURKA           | 6790                 | (Calvisi, Pinna et al. 2009; Lefebvre, Rajbhandari et al. 2010; Mencialha, Binato et al. 2012; Raghavan, Zhou et al. 2012; Sadasivam, Duan et al. 2012)                                                                                                                                                                                                                              |
| HJURP           | 55355                | (Huynh, Soh et al. 2011)                                                                                                                                                                                                                                                                                                                                                             |
| KIF20A          | 10112                | (reviewed in (Wierstra and Alves 2007)) (Davis, Lavine et al. 2010)                                                                                                                                                                                                                                                                                                                  |
| CDC20           | 991                  | (reviewed in (Wierstra and Alves 2007))                                                                                                                                                                                                                                                                                                                                              |
| PLK1            | 5347                 | (reviewed in (Wierstra and Alves 2007)) (Fu, Malureanu et al. 2008; Chen, Dominguez-Brauer et al. 2009; Alvarez-Fernandez, Halim et al. 2010; Davis, Lavine et al. 2010; Anders, Ke et al. 2011; Chen, Yang et al. 2012; Ho, Wang et al. 2012; Sadasivam, Duan et al. 2012)                                                                                                          |
| CCNB1           | 891                  | (reviewed in (Wierstra and Alves 2007)) (Fu, Malureanu et al. 2008; Laoukili, Alvarez et al. 2008; Park, Kim et al. 2008; Xia, Huang et al. 2009; Alvarez-Fernandez, Halim et al. 2010; Davis, Lavine et al. 2010; Nakamura, Hirano et al. 2010; Xue, Chiang et al. 2010; Chen, Yang et al. 2012; Mencialha, Binato et al. 2012; Sadasivam, Duan et al. 2012; Xue, Xiao et al. 2012) |
| CENPF           | 1063                 | (reviewed in (Wierstra and Alves 2007)) (Laoukili, Alvarez et al. 2008; Anders, Ke et al. 2011)                                                                                                                                                                                                                                                                                      |
| CDCA8           | 55143                | (Davis, Lavine et al. 2010; Bergamaschi, Christensen et al. 2011)                                                                                                                                                                                                                                                                                                                    |
| CENPA           | 1058                 | (reviewed in (Wierstra and Alves 2007)) (Chen, Dominguez-Brauer et al. 2009; Davis, Lavine et al. 2010; Zhou, Wang et al. 2010)                                                                                                                                                                                                                                                      |
| UBEC (UBE2C)    | 11065                | (Huynh, Soh et al. 2011)                                                                                                                                                                                                                                                                                                                                                             |
| NUSAP1          | 51203                | (Huynh, Soh et al. 2011)                                                                                                                                                                                                                                                                                                                                                             |
| CDCA2           | 157313               | (Davis, Lavine et al. 2010)                                                                                                                                                                                                                                                                                                                                                          |
| KAP (CDKN3)     | 1033                 | (reviewed in (Wierstra and Alves 2007))                                                                                                                                                                                                                                                                                                                                              |
| CDC25C          | 995                  | (reviewed in (Wierstra and Alves 2007))                                                                                                                                                                                                                                                                                                                                              |
| NEK2            | 4751                 | (reviewed in (Wierstra and Alves 2007)) (Laoukili, Kooistra et al. 2005; Calvisi, Pinna et al. 2009; Davis, Lavine et al. 2010)                                                                                                                                                                                                                                                      |
| CCNB2           | 9133                 | (reviewed in (Wierstra and Alves 2007))                                                                                                                                                                                                                                                                                                                                              |
| SMC4L1 (SMC4)   | 10051                | (Huynh, Soh et al. 2011)                                                                                                                                                                                                                                                                                                                                                             |
| E2F2            | 1870                 | (Anders, Ke et al. 2011)                                                                                                                                                                                                                                                                                                                                                             |
| CEP55           | 55165                | (Gemenetzidis, Bose et al. 2009)                                                                                                                                                                                                                                                                                                                                                     |
| TYMS            | 7298                 | (Huynh, Soh et al. 2011)                                                                                                                                                                                                                                                                                                                                                             |
| Brip1 (BRIP1)   | 83990                | (Monteiro, Khongkow et al. 2012)                                                                                                                                                                                                                                                                                                                                                     |
| RACGAP1         | 29127                | (Sadasivam, Duan et al. 2012)                                                                                                                                                                                                                                                                                                                                                        |

|                      |        |                                                                                                                                                                                                                                                                                                                                        |
|----------------------|--------|----------------------------------------------------------------------------------------------------------------------------------------------------------------------------------------------------------------------------------------------------------------------------------------------------------------------------------------|
| MCM3                 | 4172   | (Lefebvre, Rajbhandari et al. 2010)                                                                                                                                                                                                                                                                                                    |
| KIF22                | 3835   | (Huynh, Soh et al. 2011)                                                                                                                                                                                                                                                                                                               |
| CENPE                | 1062   | (Davis, Lavine et al. 2010)                                                                                                                                                                                                                                                                                                            |
| H2AFZ                | 3015   | (Huynh, Soh et al. 2011)                                                                                                                                                                                                                                                                                                               |
| PTTG1                | 9232   | (Lefebvre, Rajbhandari et al. 2010)                                                                                                                                                                                                                                                                                                    |
| CCNA2                | 890    | (Davis, Lavine et al. 2010) (reviewed in (Wierstra and Alves 2007))                                                                                                                                                                                                                                                                    |
| BUBR1<br>(BUB1B)     | 701    | (Lefebvre, Rajbhandari et al. 2010; Wan, Yeung et al. 2012)                                                                                                                                                                                                                                                                            |
| SOX4                 | 6659   | (Wang, Zhang et al. 2010)                                                                                                                                                                                                                                                                                                              |
| GMNN                 | 51053  | (Huynh, Soh et al. 2011)                                                                                                                                                                                                                                                                                                               |
| POLD3                | 10714  | (Anders, Ke et al. 2011)                                                                                                                                                                                                                                                                                                               |
| ANLN                 | 54443  | (Huynh, Soh et al. 2011)                                                                                                                                                                                                                                                                                                               |
| AURKB                | 9212   | (reviewed in (Wierstra and Alves 2007)) (Fu, Malureanu et al. 2008; Park, Wang et al. 2008; Chen, Dominguez-Brauer et al. 2009; Davis, Lavine et al. 2010; Nakamura, Hirano et al. 2010; Zhou, Wang et al. 2010; Bergamaschi, Christensen et al. 2011; Wang and Gartel 2011; Bonet, Giuliano et al. 2012; Sadasivam, Duan et al. 2012) |
| BIRC5                | 332    | (reviewed in (Wierstra and Alves 2007)) (Chen, Dominguez-Brauer et al. 2009; Dai, Pieper et al. 2010; Nakamura, Hirano et al. 2010; Ahmad, Ali et al. 2011; Bergamaschi, Christensen et al. 2011; Chen, Yang et al. 2012; Down, Millour et al. 2012)                                                                                   |
| PRDX3                | 10935  | (Park, Carr et al. 2009)                                                                                                                                                                                                                                                                                                               |
| Hsp70<br>(HSPA1A)    | 3303   | (reviewed in (Wierstra and Alves 2007))                                                                                                                                                                                                                                                                                                |
| PPIL5<br>(LRR1)      | 122769 | (Anders, Ke et al. 2011)                                                                                                                                                                                                                                                                                                               |
| CDC25B               | 994    | (reviewed in (Wierstra and Alves 2007)) (Kalin, Wang et al. 2008; Nakamura, Hirano et al. 2010; Zhou, Wang et al. 2010; Bergamaschi, Christensen et al. 2011; Wang and Gartel 2011; Ho, Wang et al. 2012; Mencialha, Binato et al. 2012)                                                                                               |
| PHF19                | 26147  | (Huynh, Soh et al. 2011)                                                                                                                                                                                                                                                                                                               |
| CHK1<br>(CHEK1)      | 1111   | (Tan, Chen et al. 2010)                                                                                                                                                                                                                                                                                                                |
| PCNA                 | 5111   | (Davis, Lavine et al. 2010; Bergamaschi, Christensen et al. 2011)                                                                                                                                                                                                                                                                      |
| ELF3                 | 1999   | (Ustiyana, Wert et al. 2012)                                                                                                                                                                                                                                                                                                           |
| p27KIP1<br>(CDKN1B)  | 1027   | (reviewed in (Wierstra and Alves 2007)) (Zeng, Wang et al. 2009; Nakamura, Hirano et al. 2010; Xue, Chiang et al. 2010; Xue, Xiao et al. 2012; Zhang, Zeng et al. 2012)                                                                                                                                                                |
| CENPB                | 1059   | (reviewed in (Wierstra and Alves 2007)) (Zhou, Wang et al. 2010; Chen, Yang et al. 2012)                                                                                                                                                                                                                                               |
| Skp2                 | 6502   | (reviewed in (Wierstra and Alves 2007)) (Park, Wang et al. 2008; Calvisi, Pinna et al. 2009; Park, Kim et al. 2009; Nakamura, Hirano et al. 2010; Zhou, Wang et al. 2010; Ahmad, Ali et al. 2011; Anders, Ke et al. 2011; Chen, Yang et al. 2012; Ho, Wang et al. 2012; Mencialha, Binato et al. 2012; Zhang, Zeng et al. 2012)        |
| BRCA2                | 675    | (reviewed in (Wierstra and Alves 2007)) (Alvarez-Fernandez, Halim et al. 2010)                                                                                                                                                                                                                                                         |
| XRCC1                | 7515   | (reviewed in (Wierstra and Alves 2007)) (Chetty, Bhoopathi et al. 2009)                                                                                                                                                                                                                                                                |
| ER $\alpha$ (ESR1)   | 2099   | (reviewed in (Wierstra and Alves 2007))                                                                                                                                                                                                                                                                                                |
| E-cadherin<br>(CDH1) | 999    | (reviewed in (Wierstra and Alves 2007)) (Zhou, Wang et al. 2010; Wierstra 2011)                                                                                                                                                                                                                                                        |
| VEGF<br>(VEGFA)      | 7422   | (Zhang, Zhang et al. 2008; Gemenetidis, Bose et al. 2009; Li, Zhang et al. 2009; Ahmad, Wang et al. 2010; Ahmad, Ali et al. 2011; Bao, Wang et al. 2011; Chen, Yuan et al. 2011; Park, Gusarova et al. 2011; Karadedou, Gomes et al. 2012; Lynch, Ferrer et al. 2012; Xue, Xiao et al. 2012)                                           |

|                     |        |                                                                       |
|---------------------|--------|-----------------------------------------------------------------------|
| KIS<br>(UHMK1)      | 127933 | (Petrovic, Costa et al. 2008; Nakamura, Hirano et al. 2010)           |
| uPAR<br>(PLAUR)     | 5329   | (Ahmad, Wang et al. 2010; Lok, Chan et al. 2011; Li, Wei et al. 2012) |
| NEDD4-1<br>(NEDD4)  | 4734   | (Dai, Pieper et al. 2010; Kwak, Wang et al. 2012)                     |
| Stathmin<br>(STMN1) | 3925   | (Carr, Park et al. 2010; Park, Gusarova et al. 2011)                  |
| CDC25A              | 993    | (reviewed in (Wierstra and Alves 2007))                               |

- Ahmad, A., S. Ali, et al. (2011). "3,3'-Diindolylmethane enhances taxotere-induced growth inhibition of breast cancer cells through downregulation of FoxM1." Int J Cancer **129**(7): 1781-1791.
- Ahmad, A., Z. Wang, et al. (2010). "FoxM1 down-regulation leads to inhibition of proliferation, migration and invasion of breast cancer cells through the modulation of extra-cellular matrix degrading factors." Breast Cancer Res Treat **122**(2): 337-346.
- Alvarez-Fernandez, M., V. A. Halim, et al. (2010). "Recovery from a DNA-damage-induced G2 arrest requires Cdk-dependent activation of FoxM1." EMBO Rep **11**(6): 452-458.
- Anders, L., N. Ke, et al. (2011). "A systematic screen for CDK4/6 substrates links FOXM1 phosphorylation to senescence suppression in cancer cells." Cancer Cell **20**(5): 620-634.
- Bao, B., Z. Wang, et al. (2011). "Over-expression of FoxM1 leads to epithelial-mesenchymal transition and cancer stem cell phenotype in pancreatic cancer cells." J Cell Biochem **112**(9): 2296-2306.
- Bergamaschi, A., B. L. Christensen, et al. (2011). "Reversal of endocrine resistance in breast cancer: interrelationships among 14-3-3zeta, FOXM1, and a gene signature associated with mitosis." Breast Cancer Res **13**(3): R70.
- Bonet, C., S. Giuliano, et al. (2012). "Aurora B Is Regulated by the Mitogen-activated Protein Kinase/Extracellular Signal-regulated Kinase (MAPK/ERK) Signaling Pathway and Is a Valuable Potential Target in Melanoma Cells." Journal of Biological Chemistry **287**(35): 29887-29898.
- Calvisi, D. F., F. Pinna, et al. (2009). "Forkhead box M1B is a determinant of rat susceptibility to hepatocarcinogenesis and sustains ERK activity in human HCC." Gut **58**(5): 679-687.
- Carr, J. R., H. J. Park, et al. (2010). "FoxM1 mediates resistance to herceptin and paclitaxel." Cancer Res **70**(12): 5054-5063.
- Chen, H., C. Yang, et al. (2012). "Adenovirus-mediated RNA interference targeting FOXM1 transcription factor suppresses cell proliferation and tumor growth of nasopharyngeal carcinoma." J Gene Med **14**(4): 231-240.
- Chen, W., K. Yuan, et al. (2011). "Deletion of Forkhead Box M1 transcription factor reduces malignancy in laryngeal squamous carcinoma cells." Asian Pac J Cancer Prev **12**(7): 1785-1788.
- Chen, Y. J., C. Dominguez-Brauer, et al. (2009). "A conserved phosphorylation site within the forkhead domain of FoxM1B is required for its activation by cyclin-CDK1." J Biol Chem **284**(44): 30695-30707.
- Chetty, C., P. Bhoopathi, et al. (2009). "Inhibition of matrix metalloproteinase-2 enhances radiosensitivity by abrogating radiation-induced FoxM1-mediated G2/M arrest in A549 lung cancer cells." Int J Cancer **124**(10): 2468-2477.

- Dai, B., R. O. Pieper, et al. (2010). "FoxM1B regulates NEDD4-1 expression, leading to cellular transformation and full malignant phenotype in immortalized human astrocytes." Cancer Res **70**(7): 2951-2961.
- Davis, D. B., J. A. Lavine, et al. (2010). "FoxM1 is up-regulated by obesity and stimulates beta-cell proliferation." Mol Endocrinol **24**(9): 1822-1834.
- Down, C. F., J. Millour, et al. (2012). "Binding of FoxM1 to G2/M gene promoters is dependent upon B-Myb." Biochim Biophys Acta **1819**(8): 855-862.
- Fu, Z., L. Malureanu, et al. (2008). "Plk1-dependent phosphorylation of FoxM1 regulates a transcriptional programme required for mitotic progression." Nat Cell Biol **10**(9): 1076-1082.
- Gemenetzidis, E., A. Bose, et al. (2009). "FOX M1 upregulation is an early event in human squamous cell carcinoma and it is enhanced by nicotine during malignant transformation." PLoS One **4**(3): e4849.
- Ho, C., C. Wang, et al. (2012). "AKT (v-akt murine thymoma viral oncogene homolog 1) and N-Ras (neuroblastoma ras viral oncogene homolog) coactivation in the mouse liver promotes rapid carcinogenesis by way of mTOR (mammalian target of rapamycin complex 1), FOXM1 (forkhead box M1)/SKP2, and c-Myc pathways." Hepatology **55**(3): 833-845.
- Huynh, K. M., J. W. Soh, et al. (2011). "FOX M1 expression mediates growth suppression during terminal differentiation of HO-1 human metastatic melanoma cells." J Cell Physiol **226**(1): 194-204.
- Kalin, T. V., I. C. Wang, et al. (2008). "Forkhead Box m1 transcription factor is required for perinatal lung function." Proc Natl Acad Sci U S A **105**(49): 19330-19335.
- Karadedou, C. T., A. R. Gomes, et al. (2012). "FOXO3a represses VEGF expression through FOXM1-dependent and -independent mechanisms in breast cancer." Oncogene **31**(14): 1845-1858.
- Kwak, Y. D., B. Wang, et al. (2012). "Upregulation of the E3 ligase NEDD4-1 by oxidative stress degrades IGF-1 receptor protein in neurodegeneration." J Neurosci **32**(32): 10971-10981.
- Laoukili, J., M. Alvarez, et al. (2008). "Activation of FoxM1 during G2 requires cyclin A/Cdk-dependent relief of autorepression by the FoxM1 N-terminal domain." Mol Cell Biol **28**(9): 3076-3087.
- Laoukili, J., M. R. Kooistra, et al. (2005). "FoxM1 is required for execution of the mitotic programme and chromosome stability." Nat Cell Biol **7**(2): 126-136.
- Lefebvre, C., P. Rajbhandari, et al. (2010). "A human B-cell interactome identifies MYB and FOXM1 as master regulators of proliferation in germinal centers." Mol Syst Biol **6**: 377.
- Li, D., P. Wei, et al. (2012). "The Critical Role of Dysregulated FOXM1-PLAUR Signaling in Human Colon Cancer Progression and Metastasis." Clin Cancer Res.
- Li, Q., N. Zhang, et al. (2009). "Critical role and regulation of transcription factor FoxM1 in human gastric cancer angiogenesis and progression." Cancer Res **69**(8): 3501-3509.
- Lok, G. T., D. W. Chan, et al. (2011). "Aberrant activation of ERK/FOX M1 signaling cascade triggers the cell migration/invasion in ovarian cancer cells." PLoS One **6**(8): e23790.
- Lynch, T. P., C. M. Ferrer, et al. (2012). "Critical role of O-Linked beta-N-acetylglucosamine transferase in prostate cancer invasion, angiogenesis, and metastasis." J Biol Chem **287**(14): 11070-11081.
- Mencalha, A. L., R. Binato, et al. (2012). "Forkhead Box M1 (FoxM1) Gene Is a New STAT3 Transcriptional Factor Target and Is Essential for Proliferation, Survival and DNA Repair of K562 Cell Line." PLoS One **7**(10): e48160.
- Monteiro, L. J., P. Khongkow, et al. (2012). "The Forkhead Box M1 protein regulates BRIP1 expression and DNA damage repair in epirubicin treatment." Oncogene.



- Nakamura, S., I. Hirano, et al. (2010). "The FOXM1 transcriptional factor promotes the proliferation of leukemia cells through modulation of cell cycle progression in acute myeloid leukemia." *Carcinogenesis* **31**(11): 2012-2021.
- Park, H. J., J. R. Carr, et al. (2009). "FoxM1, a critical regulator of oxidative stress during oncogenesis." *EMBO J* **28**(19): 2908-2918.
- Park, H. J., G. Gusarova, et al. (2011). "Deregulation of FoxM1b leads to tumour metastasis." *EMBO Mol Med* **3**(1): 21-34.
- Park, H. J., Z. Wang, et al. (2008). "An N-terminal inhibitory domain modulates activity of FoxM1 during cell cycle." *Oncogene* **27**(12): 1696-1704.
- Park, T. J., J. Y. Kim, et al. (2008). "TIS21 negatively regulates hepatocarcinogenesis by disruption of cyclin B1-Forkhead box M1 regulation loop." *Hepatology* **47**(5): 1533-1543.
- Park, T. J., J. Y. Kim, et al. (2009). "Skp2 enhances polyubiquitination and degradation of TIS21/BTG2/PC3, tumor suppressor protein, at the downstream of FoxM1." *Exp Cell Res* **315**(18): 3152-3162.
- Petrovic, V., R. H. Costa, et al. (2008). "FoxM1 regulates growth factor-induced expression of kinase-interacting stathmin (KIS) to promote cell cycle progression." *J Biol Chem* **283**(1): 453-460.
- Raghavan, A., G. Zhou, et al. (2012). "Hypoxia-induced pulmonary arterial smooth muscle cell proliferation is controlled by forkhead box M1." *Am J Respir Cell Mol Biol* **46**(4): 431-436.
- Sadasivam, S., S. Duan, et al. (2012). "The MuvB complex sequentially recruits B-Myb and FoxM1 to promote mitotic gene expression." *Genes Dev* **26**(5): 474-489.
- Tan, Y., Y. Chen, et al. (2010). "Two-fold elevation of expression of FoxM1 transcription factor in mouse embryonic fibroblasts enhances cell cycle checkpoint activity by stimulating p21 and Chk1 transcription." *Cell Prolif* **43**(5): 494-504.
- Ustiyani, V., S. E. Wert, et al. (2012). "Foxm1 transcription factor is critical for proliferation and differentiation of Clara cells during development of conducting airways." *Dev Biol* **370**(2): 198-212.
- Wan, X., C. Yeung, et al. (2012). "Identification of FoxM1/Bub1b Signaling Pathway as a Required Component for Growth and Survival of Rhabdomyosarcoma." *Cancer Res* **72**(22): 5889-5899.
- Wang, I. C., L. Meliton, et al. (2009). "Deletion of Forkhead Box M1 transcription factor from respiratory epithelial cells inhibits pulmonary tumorigenesis." *PLoS One* **4**(8): e6609.
- Wang, I. C., Y. Zhang, et al. (2010). "Increased expression of FoxM1 transcription factor in respiratory epithelium inhibits lung sacculation and causes Clara cell hyperplasia." *Dev Biol* **347**(2): 301-314.
- Wang, M. and A. L. Gartel (2011). "The suppression of FOXM1 and its targets in breast cancer xenograft tumors by siRNA." *Oncotarget* **2**(12): 1218-1226.
- Wierstra, I. (2011). "The transcription factor FOXM1c binds to and transactivates the promoter of the tumor suppressor gene E-cadherin." *Cell Cycle* **10**(5): 760-766.
- Wierstra, I. and J. Alves (2007). "FOX M1, a typical proliferation-associated transcription factor." *Biol Chem* **388**(12): 1257-1274.
- Xia, L. M., W. J. Huang, et al. (2009). "Transcriptional up-regulation of FoxM1 in response to hypoxia is mediated by HIF-1." *J Cell Biochem* **106**(2): 247-256.
- Xue, L., L. Chiang, et al. (2010). "FoxM1, a forkhead transcription factor is a master cell cycle regulator for mouse mature T cells but not double positive thymocytes." *PLoS One* **5**(2): e9229.
- Xue, Y. J., R. H. Xiao, et al. (2012). "Overexpression of FoxM1 is associated with tumor progression in patients with clear cell renal cell carcinoma." *J Transl Med* **10**: 200.
- Zeng, J., L. Wang, et al. (2009). "FoxM1 is up-regulated in gastric cancer and its inhibition leads to cellular senescence, partially dependent on p27 kip1." *J Pathol* **218**(4): 419-427.

- Zhang, X., J. Zeng, et al. (2012). "The tumor suppressive role of miRNA-370 by targeting FoxM1 in acute myeloid leukemia." Mol Cancer **11**(1): 56.
- Zhang, Y., N. Zhang, et al. (2008). "FoxM1B transcriptionally regulates vascular endothelial growth factor expression and promotes the angiogenesis and growth of glioma cells." Cancer Res **68**(21): 8733-8742.
- Zhou, J., C. Wang, et al. (2010). "Attenuation of Forkhead signaling by the retinal determination factor DACH1." Proc Natl Acad Sci U S A **107**(15): 6864-6869.
